# Supplementary material for: Indigenous Knowledge of New Guinea’s Useful Plants: A Review1
Source: Springer Nature journal article supplement (doi:10.1007/s12231-019-09464-1), 2019-07-24
Supplement: MOESM1 [file 12231_2019_9464_MOESM1_ESM.xlsx]

## Sheet: Sheet1
No	Reference
1	Abdillahi et al. 2010. Ethnobotany, phytochemistry and pharmacology of Podocarpus sensu latissimo (s.l.). South African Journal of Botany 76: 1-10.
2	Adema et al. 1994. Flora Malesiana Series 1: Volume 11 Part 3.
3	Adinugraha & Susilawati. 2014. Variasi Kandungan Kimia Tanaman Sukun Dari Beberapa Populasi Di Indonesia Sebagai Sumber Pangan Dan Obat (Variation on Chemical Contents of Breadfruit (Artocarpus altilis [Parkinson] Fosberg) Taken from Several Populations in Indonesia as Source of Food and Medicine. Jurnal Hutan Tropis 2(3): 226-232.
4	Aji. 2000. Pengetahuan lokal Pembuatan Perahu Tradisional Oleh Suku Biak Di Kecamatan Warsa Kabupaten Biak Numfor.Jurusan Kehutanan, Fakultas Pertanian, Universitas Cenderwasih, Manokwari.
5	Alara et al. 2016. Review on Phaleria macrocarpa Pharmacological and Phtochemical Properties. Drug Designing 5 (3).
6	Ambarwati et al. 2017. Pharmacognostic and Antimicrobial Studies of Garcinia latissima Miq. Leaves (Clusiaceae). Pharmacognosy Journal 9 (4): 493-498.
7	Anastasia. 2007. Efektivitas zodia (Evodia suaveolens) sebagai penghalau nyamuk culex. Universitas Kristen Maranatha.
8	Andersen. 2006. Babrongko: Material culture of a Lake Sentani Village, New Guinea. Cenderawasih University, Jayapura, Papua, Indonesia.
9	Andersen. 2006. The Ketengban people of the greater Nongme area and their envrionment. Cenderawasih University, Jayapura, Papua, Indonesia.
10	Andersen. 2007. The Lepki people of Sogber River, New Guinea. Cenderawasih University, Jayapura, Papua, Indonesia.
11	Anon. 2009. Tahukah Kita: Kayu Marero (Lumnitzera littoralis) adalah lambang kasih sayang bagi masyarakat etnik Tamakuri, Papua.Warta Konservasi Latan Basah (Wetlands International) 17(3): 24.
12	Anstice. 2004. First Contact: A 21st century discovery of cannibals. Book.
13	Argent, G. 2001. Contributions to the Flora of Mt Jaya VI. A New Banana, Musa johnsii (Musaceae) from New Guinea. Gardens' Bulletin Singapore 53: 1-7.
14	Arobaya & Pattiselanno. 2007. Ethnobotany of Dasigo Tribe of Mamberamo in Papua. Beccariana 9(1): 1-4.
15	Arobaya & Pattiselanno. 2010. Hutan mangrove dan kelompok etnis di Papua: Bentuk pemanfaatannya oleh masyarakat lokal. Biota 15(3). https://fpattiselanno.wordpress.com/2010/10/25/hutan-mangrove-dan-kelompok-etnis-di-papua-bentuk-pemanfaatannya-oleh-masyarakat-lokal/
16	Arobaya & Pattiselanno. 2011. Human-Plants Interaction: A Case Study on Useful Plants of Dasigo Tribe from Mamberamo, Papua Indonesia. In: Perspectives in Animal Ecology and Reproduction.
17	Arobaya and Pattiselanno. 2007. The Useful Plants of Dani Ethnic Groups at The Baliem Valley of Papua. Biota 12 (3): 192-195.
18	Arobaya et al. 2010. Forage food of Timor Deer (Cervus timorensis) in Manokwari, West Papua. Animal Production, 12 (2): 91-95.
19	Arobaya. 2014. Fuel Wood Utilization as alternative energy resource in Mamberamo Hulu of Papua. Jurnal Hutan Tropis 2(2): 88-93.
20	Arung et al. 2012. Antioxidant compounds from leaves of Tahongai (Klienhovia hospita). Journal of Wood Science 58: 77-80.
21	Asa. 2013. Tanaman pokem dalam tradisi lokal etnis Biak di Pulau Numfor, Kabupaten Biak Numfor. Kementerian Pendidikan dan Kebudayaan, Direktorat Jenderal Kebudayaan, Balai Pelestarian Nilai Budaya Papua, 2013. Report.
22	Assa et al. 2015. Tanaman Pokem Dalam Tradisi Lokal Etnis Biak di Pulau Numfor Kabupaten Biak Numfor.
23	Astirin et al. 2009. The effect of Crude Extract of Pandanus conoideus Lamb. Var. Yellow Fruit on Apoptotic Expression of the Breast Cancer Cell Line (T47D). Biodiversitas 10(1): 44-48.
24	Attamimi. 1997. Pengetahuan masyarakat suku mooi tentang pemanfaatan sumber daya nabati di dusun maibo desa aimas kabupaten sorong.Jurusan Kehutanan, Fakultas Pertanian, Universitas Cenderwasih, Manokwari.
25	Ave. 1998. Preliminary List of the Use of the Plants of Ayawasi. Book.
26	Baharuddin & Taskirawati. 2009. Buka Ajar: Hasil Hutan Bukan Kayu. Fakultas Kehutanan Universitas Hasanuddin.
27	Baker & Dransfield. 2017. More new rattans from New Guinea and the Solomon Islands (Calamus, Arecaceae). Phytotaxa 305 (2): 061–086.
28	Baker et al. 2006. Dransfieldia (Arecaceae) A New Palm Genus from Western New Guinea. Syst. Bot. 31(1): 61-69.
29	Baker. 2005. Rattans and rheophytes of Mubi River. Principes 41(3): 148-157.
30	Baker, W. J., & Dransfield, J. 2014. New rattans from New Guinea (Calamus, Arecaceae). Phytotaxa, 163(4): 181-215.
31	Baker, W. J., & Dransfield, J. 2002. Calamus longipinna (Arecaceae: Calamoideae) and its relatives in New Guinea. Kew Bulletin 853-866.
32	Baker, W. J., & Heatubun, C. D. 2012. New palms from Biak and Supiori, Western New Guinea. Palms 56(3): 131.
33	Baker, W. J., Bayton, R. P., Dransfield, J., & Maturbongs, R. A. 2003. A revision of the Calamus aruensis (Arecaceae) complex in New Guinea and the Pacific. Kew Bulletin 351-370.
34	Balun & Holdsworth. 1988. Ethnomedicine of the Gulf Province of Papua New Guinea PART I: The Mountains Around Kanabea and Kaintiba. International Journal of Crude Drug Research 26(1): 51-55.
35	Banka, R., & Baker, W. J. 2004. A monograph of the genus Rhopaloblaste (Arecaceae). Kew Bulletin: 47-60.
36	Barden et al. 2000. Heart of the Matter: Agarwood Use and Trade and CITES Implementation for Aquilaria malaccensis.
37	Barfod et al. 2001. Field Guide to Palms in Papua New Guinea with a multi-access key and notes on the genera. AAU Reports, 40.
38	Barfod, A. S. 2000. A new species of Licuala from New Guinea. Palms: 44(4): 198-201.
39	Barfod, A. S., & Heatubun, C. D. 2009. Two new species of Licuala Thunb. (Arecaceae: Coryphoideae) from North Moluccas and Western New Guinea. Kew Bulletin 64(3): 553-557.
40	Barker. 1985. A survey of the utilization of bush resources in Kamus: November 1984-February 1985. Book.
41	Barrau. 1956. Les ignames alimentaires des Iles du Pacifique Sud. Journal d'Agriculture Tropicale et de Botanique Appliquée 3(7-8): 385-401.
42	Barrau. 1958. Nouvelles observations au sujet des plantes hallucinogènes d'usage autochtone en Nouvelle-Guinée. Journal d'Agriculture Tropicale et de Botanique Appliquée 5 (4-5): 377-378.
43	Barrau. 1959. The Sago Palms and Other Food Plants of Marsh Dwellers in the South Pacific Islands. Economic Botany 13(2): 151-162.
44	Barrau. 1965. Witnesses of the past: notes on some food plants of Oceania. Ethnology 4(3): 282-294.
45	Barrows et al. 2007. Anti-TB activity of Evodia elleryana bark extract. Fitoterapia 78 (3): 250-252.
46	Bau & Poulsen. 2007. Ethnobotanical Notes on Gingers of the Huon Peninsula in Papua New Guinea.Gardens' Bulletin Singapore 59 (1&2): 23-34.
47	Berg & Corner. 2005. Flora Malesiana. Series 1: Volume 17 (2).
48	Berg, Corner & Jarrett. 2006. Flora Malesiana. Series 1: Volume 17.
49	Blackwood. 1940. Ues of plants among the Kukukuku of southeast-central New Guinea. Proceedings of the Sixth Pacific Science Congress of the Pacific Science Association, vol. 4, pp. 111-126. Berkeley & Los Angeles: University of California Press.
50	Blench. 2008. A history of fruits on the Southeast Asian mainland. Occasional Paper 4: 115-137.
51	Boer & Ella (Eds.). 2000. Plant Resources of South-East Asia No. 18 Plants producing exudates. Book.
52	Bohs. 1989. Ethnobotany of the Genus Cyphomandra (Solanaceae). Economic Botany 43(2): 143-163.
53	Boissiére et al. 2007. People priorities and perceptions: Towards conservation partnership in Mamberamo. Center for International Forestry Research: Jakarta, Indonesia.
54	Boissiere. 1999. Etnobiologi dan hubungan masyarakat suku Yali dengan alam lingkungan di Irian Jaya (Indonesia). PhD Thesis.
55	Boissière. 1999. La Patate Douce Et L'arachide. Transformations D'une Agriculture Yali (Irian Java, Indonesie). Journal d'agriculture traditionnelle et de botanique appliquée 41(1): 131-156.
56	Boland et al. 1977. Eucalyptus deglupta Blume And Araucaria cunninghamii Lambert Provenance Seed Collections in Irian Jaya, Indonesia, 3–17 June 1975. Forest Genetic Resources Information 6: 3-15.
57	Bolza. 1975. Properties and Uses of 175 Timber Species from Papua New Guinea and West Irian. Division of Building Research, Melbourne.
58	Bonnemère. 1993. Pangium edule: A food for the social body among the Ankave-anga of Papua New Guinea. Man and the Biosphere Series, 13: 661-672. Chapter 36
59	Bourke. 1982. Root crops in Papua New Guinea. In: Proceedings of the 5th International Symposium on Tropical Root and Tuber Crops.
60	Bourke. 1992. Fifty years of Agricultural Change in A New Guinea Highland Village.in: Proceedings of the First Papua New Guinea Food and Nutrition Conference: Changes in Food and Nutrition in the Last Three Decades, 26-53.
61	Bourke. 1996. Edible Indigenous Nuts in Papua New Guinea. In: Stevens, M. L., Bourke, R. M. and Evans, B. R., ed. 1996. South Pacific Indigenous Nuts. Proceedings of a workshop held from 31 October to 4 November 1994 at Le Lagon Resort, Port Vila, Vanuatu. ACIAR Proceedings No. 69, 176: 45-55
62	Bourke. 1997. Management of fallow species composition with tree planting in Papua New Guinea. Paper presented for the Resource Management in Asia-Pacific Seminar Series 5 June 1997.
63	Bourke. 2001. Intensification of agricultural systems in Papua New Guinea. Asia Pacific Viewpoint 42 (2/3): 219-235.
64	Bourke. 2010. Altitudinal limits of 230 economic crop species in Papua New Guinea. In: Altered Ecologies: Fire, Climate and Human Influence on Terrestrial Landscapes. Terra Australis, 32.
65	Bourke. 2010. Indigenous Edible Nuts in Papua New Guinea. In: Quartermain, A.R. and Tomi, B. (eds). 2010. Fruits and Nuts: Research and Development Issues in Papua New Guinea. Workshop Proceedings No. 9. National Agricultural Research Institute, Lae, Papua New Guinea. Chapter 12
66	Bourke. 2010. Indigenous Fruit in Papua New Guinea. In: Quartermain, A.R. and Tomi, B. (eds) 2010. Fruits and Nuts: Research and Development Issues in Papua New Guinea. Workshop Proceedings No. 9. National Agricultural Research Institute, Lae, Papua New Guinea. Chapter 6
67	Bowers. 1964. A further note on a recently reported root crop from the New Guinea Highlands. The Journal of the Polynesian Society 73 (3): 333-335.
68	Brawijasari et al. 2013. Antibacterial Activity and Bioautography Of Ethanol Extract Of Akway (Drimys piperita Hook. f.) Bark Against Bacillus subtilis and Pseudomonas aeuruginosa.
69	Brink & Escobin (Eds.). 2003. Plant Resources of South-East Asia No. 17 Fibre Plants. Book.
70	Bromley & Barrau. 1965. Présence d'un Coïx cultivé dans les montagnes de la Nouvelle-Guinée.Journal d'agriculture tropicale et de botanique appliquée, 12(12): 781-782.
71	Brown. 1978. Timbers of the World 8: Australasia. Book.
72	Brownson et al. 2002. The cycad neurotoxic amino acid, ß-N-methylamino-L-alanine (BMAA), elevates intracellular calcium levels in dissociated rat brain cells. Journal of Ethnopharmacology 82: 159-167.
73	Bulmer. 1964. Edible seeds and prehistoric stone mortars in the Highlands of East New Guinea. Man 64: 147-150.
74	Buntu. 2002. Tingkat kesukaan burung cenderawasii (Paradisaea sp) Terhadap beberapa jenis pakan di taman burung dan taman anggrek biak. Fakultas Pertanian Universitas Negeri Papua Manokwari.
75	Burnett et al. 2003. Flora and Fauna Survey of the Tangguh LNG Site Papua Province, Indonesia.
76	Cabuy et al. 2012. Non-woody plant species of Papuan island forests, a sustainable source of food for the local communities. Indian Journal of Traditional Knowledge 11(4).
77	Cameron et al. 2016. Uji Bioaktivitas Ekstrak Daun Zodea (Evodia suaveolens Scheff) terhadap Hama Gudang Tribolium castaneum (Coleoptera: Tenebrionidae) Herbst.E-Jurnal Agrokoteknologi Tropikam, 5(3): 222-231.
78	Case et al. 2005. Factors in Maintaining Indigenous Knowledge among the Ethnic Communties of Manus Island. Economic Botany, 59(4): 356-365.
79	Case et al. 2006. Ethnopharmacological evaluation of the informant consensus model on anti-tuberculosis claims among the Manus. Journal of Ethnopharmacology, 106, 82-89.
80	Cepeda et al. 2011. Komposisi Kimia Minyak Atsiri Kulit Kayu Akway (Drimys piperita hook F.). Bionatura-Jurnal Ilmu-ilmu Hayati dan Fisik, 13 (2): 118-124.
81	Chaplin. 1993. Silvicultural Manual for the Solomon Islands. Book.
82	Choudhary et al. 2017. Anti-fertility and abortifacient potential of hydroalcoholic leaves extract of Alstonia scholaris in female rats: An ethnomedicine used by Papua women in New Guinea. Bulletin of Faculty of Pharmacy, Cario University, 55, 123-127.
83	Coiffier. 2002. Une « huile » végétale aux multiples usages dans la région du fleuve Sépik (Papouasie Nouvelle-Guinée).Journal de la Societé des Océanistes 114-115.
84	Collier. 1987. Illness and Tradtional Medicines of the Tepera. Irian, 15, 62-103.
85	Compton & Zich. 2002. Gyrinops ledermannii (Thymelaeaceae), being an agarwood-producing species prompts call for further examination of taxonomic implications in the generic delimitation between Aquilaria and Gyrinops. Flora Malesian Bulletin 13(1): 61-65.
86	Conn. 1995. Handbooks of the Flora of Papua New Guinea Volume 3. Melbourne University Press, Carlton South, Victoria.
87	Conservation International. 2006. Altas Sumberdaya Pesisir Kabupaten Raja Ampat Provinsi Irian Jaya Barat.
88	Cook. 2016. Amungme ethnobotany.
89	Cooper. 1971. Some Botanical and Phytochemical Observations in Netherlands New Guines "New Zealand New Guines Expedition 1961. Economic Botany 25(4): 345-356.
90	Crittenden. 1982. Sustenance, seasonality and social cycles on the Nembi plateau, Papua New Guinea. PhD Thesis.
91	Croft & Leach. 1985. New Guinea Salt Fern (Asplenium acrobryum complex): Identity, Distribution and Chemical Composition of Its Salt. Economic Botany 39(2): 139-149.
92	Croft. 1982. Ferns and Man in New Guine based on a paper presented to Papua New Guinea Botany Society 1982. http://155. 187. 2. 24/fern/ferns-man-ng.html
93	Dahruddin et al. 2005. Jenis-Jenis Tumbuhan Sumber Pakan dan Tempat Bersarang Kuskus (Famili Phalangeridae) di Cagar Alam Biak Utara, Papua. Biodiversitas, 6(4): 253-258.
94	de Guzman & Siemonsma (Eds). 1999. Plant Resoruces of South-East Asia No. 13 Spices. Book.
95	De Kok & Mabberley. 1999. The Genus Faradaya (Labiatae). Blumea 44: 321-342.
96	de Kok et al. 2009. The genus Teijsmanniodendron Koord. (Lamiaceae). Kew Bulletin 64, 587-625.
97	de Kok. 2012. A revision of the genus Gmelina (Lamiaceae). Kew Bulletin 67, 293-329.
98	de Kok. 2013. The genus Premna L., (Lamiaceae) in the Flora Malesiana area. Kew Bulletin 68 (1): 55-84.
99	de Padua et al. (Eds.). 1999. Plant Resources of South-East Asia No. 12 (1) Medicinal and poisonous plants 1. Book.
100	de Wilde & Duyfjes. 2010. Flora Malesiana. Series 1: Volume 19.
101	de Wilde & Duyfjes. 2016. Flora Malesiana. Series 1: Volume 22.
102	de Wilde. 2000. Flora Malesiana. Series 1: Volume 14.
103	Desianto. 2002. Diversitas palem pada bagian utara kawasan cagar alam pegunungan Cyclops. Beccariana 4(1): 1-14.
104	Dirgantara et al. 2013. Uji Aktivitas Antioksidan Tiga Spesies Tanaman Sarang Semut (Famili: Rubiaceae) Asal Kabupaten Merauke, Papua. Jurnal Biologi Papua, 5 (1): 10-16.
105	Djamalui. 1998. Jenis-jenis tumbuhan berkayu dan pemanfaatannya dalam kehidupan suku Sougb di desa sururey kecamatan Sururey kabupaten Dati ii Manokwari.Fakultas Pertanian Universitas Cenderawasi Manokwari.
106	Djoht. 2002. Etnobotani Pisang Suku Karon: Studi tentang Ekologi Pangan Pokok. Antropologi Papua 1(2).
107	Dowe, J. L., & Barfod, A. S. 2001. New species of Livistona R. Br.(Arecaceae) from north Queensland and Papua New Guinea. Austrobaileya, 6(1): 165-174.
108	Dowe, J. L., & Ferrero, M. D. 2001. Revision of Calyptrocalyx and the New Guinea species of Linospadix (Linospadicinae: Arecoideae: Arecaceae). Blumea 46(2): 207-251.
109	Dransfield & Manokaran (Eds.). 1993. Plant Resources of South-East Asia No. 6 Rattans. Book.
110	Dransfield & Widjaja. 1995. Plant Resources of South-East Asia No. 7 Bamboos. Book.
111	Dransfield, J., & Baker, W. J. 2003. An account of the Papuasian species of Calamus (Arecaceae) with paired fruit.Kew bulletin, 371-387.
112	Duwila et al. 2003. Pemanfaatan jenis-jenis Kayu Sebagai Bahan Baku Pembuatan Perahu Tradisional oleh Masyarakat Kampung Wariap Distrik Ransiki Kabupaten Manokwari. Beccariana, 5 (2): 109-116.
113	Dwyer & Minnegal. 1990. Yams and Megapode Mounds in the Lowland Rain Forest of Papua New Guinea. Human Ecology 18(2): 177-185.
114	Dwyer & Minnegal. 1992. Ecology and Community Dynamics of Kubo People in the Tropical Lowlands of Papua New Guinea.Human Ecology, 20(1): 21-55.
115	Dwyer & Minnegal. 1994. Sago Palms and Variable Garden Yields: A Case Study from Papua New Guinea. Man and Culture in Oceania, 10, 81-102.
116	Eddowes. 1977. Commercial Timbers of Papua New Guinea: Their Properties and Uses. Book.
117	Edison et al. 2002. The exploration of Musaceae in Irian Jaya (Papua). Research Institute for Fruits Central Research Institute for Horticulture.
118	Ehrlich. 2000. "Inedible" to "Edible": Firewalking and the Ti Plant [Cordyline fruticosa (L.) A. Chev]. The Journal of the Polynesian Society, 109 (4): 371-400.
119	Ekowati. 2013. Karakteristik Ekologi, Potensi Dan Upaya Konservasi Tumbuhan Tebu Rawa (Hanguana malayana) Di Kabupaten Mappi, Papua. Sekolah Pasca Sarjana Institut Pertanian Bogor Bogor.
120	Emsley. 1989. False Sago Palm Harbours deadly amnio acid. New Scientist, 124, 1685.https://www.newscientist.com/article/mg12416852-400-science-false-sago-palm-harbours-deadly-amino-acid/
121	Essig & Young. 1980. Palm collecting in Papua New Guinea. I. The Northeast. Principes 24(1): 14-28.
122	Essig. 1995. A checklist and analysis of the palms of the Bismarck archipelago. Principes 39(3): 123-129.
123	Farjon. 2017. A handbook of the World's confiers. Brill, Leiden.
124	Fatem et al. 2014. Ethno-Biological Notes on the Meyah Tribe From the Northern Part of Manokwari, West Papua (Catatan Etnobiologi Pada Suku Meyah di Pantai Utara Manokwari, Papua Barat). Jurnal Manusia dan Lingkungan 21 (1): 121-127.
125	Fernandez et al. 2010. Antiparasitic activity of alkaloids from plant species of Papua New Guinea and Australia. International Journal of Antimicrobial Agents 36: 275-279.
126	Flach & Rumawas (Eds.). 1996. Plant Resources of South-East Asia No. 9 Plant yielding non-seed carbonhydrates. Book.
127	Flavelle. 1991. A Traditional Agroforestry Landscape on Fergusson Island, Papua New Guinea. Doctoral dissertation, University of British Columbia.
128	Forster. 1990. Notes on Aclepiadaceae 2. Austrobaileya 3(2): 273-289.
129	Forster. 1993. The Synonymy of Anodendron paniculatum (Apocynaceae) with Notes on Distribution and Ethnobotany in Papuasia. Kew Bulletin 48 (1): 139-142.
130	French. 1986. Food plants of Papua New Guinea. 2nd edition.
131	French. 2006. Sago and Gardening Foi Kutubu; A subsistence food production system based on sago production. Food Plants International, Tasmania.
132	Fundter & Wisse. 1977. 40 Belangrijke Houtsoorten Uit Indonesisch Nieuw Guinea (Irian Jaya) Met De Anatomische En Technische Kenmerken 40 Important timber species from Indonesian New Guinea (Irian Jaya) with their anatomical and technical characteristics. Book.
133	Gagne. 1982. Staple crops in subsistence agriculture.in: Biogeography and Ecology of New Guinea-Part 2.
134	Gardner. 2003. Piper (Piperaceae) In New Guinea: The Non-Climbing Species. Blumea 48: 47-68.
135	Gardner. 2010. Plant names of the Kalam (Upper Kaironk Valley, Schrader Range, Papua New Guinea). Records of the Auckland Museum, 47: 5-50.
136	Girard & Barrau. 1957. Quelques plantes alimentaires en usage chez les Buang.Journal d'agriculture tropicale et de botanique appliquée 4(5-6): 212-227.
137	Glick. 1967. Medicine as an Ethnographic Category: The Gimi of the New Guinea Highlands. Ethnology 6(1): 31-56.
138	Godschalk. 1993. Sela Valley: An Etnography of a Mek Society in the Eastern Highlands, Irian Kaya, Indonesia. Thesis.
139	Grossman. 1991. Diet, income, and subsistence in an eastern highland village, Papua New Guinea. Ecology of Food and Nutrition 26(3): 235-253.
140	Grubben & Soetjipto Partohardjono (Eds.). 1996. Plant Resources of South-East Asia No. 10 Cereals. Book.
141	Gusbager et al. 2003. Jenis Palem Di Daerah Aliran Sungai Tami Arso-Jayapura (Palem Species in the River Basin od Tami, Arso Jayapura). Beccariana 5 (2): 82-96.
142	Haberle. 2005. Ethnobotany of the Tari Basin, Southern Highlands Province, Papua New Guinea. Palaeoworks Technical Paper 6.
143	Hamsar & Mizaton. 2012. Potential of Ant-Nest Plants As An Alternative Cancer Treatment. Journal of Pharmacy Research 5 (6): 3063-3066.
144	Hamzah et al. 2003. Pemanfaatan Tumbuhan Obat Tradisional Oleh Masyarakat Pulau Mansinam Kabupaten Manokwari (The Use of Plants for Traditional Medicine by People Living in Mansinam Island of Manokwari). Beccariana 5 (2): 52-60.
145	Handayani. 2014. Etnofarmakologi Papua.
146	Hanum & van der Maesen (Eds.). 1997. Plant Resources of South-East Asia No. 11 Auxiliary Plants. Book.
147	Hanum & Warseno. 2015. Dimorphanthera kempteriana Schltr. LIANA BERPOTENSI HIAS. Warta Kebun Raya 13(1): 40-43.
148	Hapsari. 2010. Studi Kimia Dan Farmakologi: Tumbuhan Obat Indonesia, Kayu Lawang, (Cinnamomum culilaban (L.) Presl.). Fakultas Matematika Dan Ilmu Pengetahuan Alam Program Studi Magister Ilmu Kimia Depok.
149	Harbelubun. 2005. Natural colourant plant and the use of traditionally by tribe of Marori Men-Gey in Wasur National Park, Merauke Regency. Biodiversitas 6 (4): 281-284.
150	Hariadi. 2008. Pendugaan Daya Tampung Walabi Lincah (Macropus agilis) di Padang Rumput Mar Taman Nasional Wasur Merauke. Jurnal Ilmu Peternakan Dan Veteriner 3(2): 58-63.
151	Hart. 1973. Timbers of South East Asia. Book.
152	Hartemink. 2010. The invasive shrub Piper aduncum in Papua New Guinea: a review. Journal of Tropical Forest Science 22(2): 202-213.
153	Hartzlet. 1987. Health Care Options and Attitudes Amoung The Sentani.Irian, 15: 49-60.
154	Haryanto et al. 2009. Pemanfaatan Tumbuhan Obat Masyarakat Marind yang Bermukim di Taman Nasional Wasur, Merauke. Jurnal Biologi Papua 1(2): 58-64.
155	Hastuti. 2002. Tumbuhan Obat Menurut Etnobotani suku Biak. Beccariana 4(1): 20-40.
156	Hays. 1979. Plant Classification and Nomenclature in Ndumba, Papua New Guinea Highlands. Faculty Publications Paper 286.
157	Hays. 1980. Uses of Wild Plants in Ndumba, Eastern Highlands Province. Science in New Guinea 7(3): 118-131.
158	Hays. 1981. Some Cultivated Plants in Ndumba, Eastern Highlands Province. Science in New Guinea 8(2): 122-131.
159	Hays. 1999. Revision of Homalomena (Araceae-Homalomeneae) in New Guinea, The Bismarck Archipelago and Solomon Islands. Blumea 44: 41-71.
160	Hays. 2003. They are Beginning to Learn the Use of Tobacco: Cultural Context and the Creation of a Passion in Colonial Papua New Guinea. In: Drugs, labor and colonial expansion.
161	Heatubun & Wally. 2000. Jenis Bambu Di Pulau Mansinam, Manokwari, Irian Jaya (The Bamboo Species in Mansinam Island, Manokwari, Irian Jaya). Beccariana: 2(2): 65-69.
162	Heatubun et al. 2012. A monograph of the betel nut palms of East Malesia. Bot J Linn Soc 168: 147-173.
163	Heatubun et al. 2013. A new species of betel nut palm (Areca: Arecaceae) from western New Guinea. Phytotaxa 154(1).
164	Heatubun et al. 2014. Three new genera of Arecoid palm from eastern Malesia. Kew Bulletin 69.
165	Heatubun et al. 2009. A monograph of Cyrtostachys. Kew Bulletin 64(1).
166	Heatubun et al. 2014. Palms on the Nickel Island: An Expedition to Gag Island, Western New Guinea. Palms, 58(3): 115-134.
167	Heatubun et al. 2018. A monograph of the Nengella group of Hydriatele (Arecaceae). Kew Bulletin 73 (1): 18.
168	Heatubun. 2000. Beberapa Jenis Palem Hias Di Kawasan Hutan Teminabuan Sorong, Irian Jaya (Some Species of Ornamental Palm in Teminabuan Forest Area, Sorong, Irian Jaya). Beccariana 2(2): 70-74.
169	Heatubun. 2016. Areca jokowi: a New Species of Betel Nut Palm (Arecaceae) from Western New Guinea. Phytotaxa 288(2): 175-180.
170	Heatubun, Gardiner & Baker. 2012. Heterospathe elata, a new record for the New Guinea islands. Palms 56(2): 61-64.
171	Hendra et al. 2011. Flavonoid Analyses and Antimicrobial Activity of Various Parts of Phaleria macrocarpa (Scheff.) Boerl Fruit. International Journal of Molecular Sciences 12, 3422-3431.
172	Henty. 1960. Two drug plants in Native Culture. Transactions of the Papua and New Guinea Scientific Society: 19-20.
173	Henty. 1969. A Manual of the Grasses of New Guinea. Book.
174	Henty. 1980. Harmful Plants in Papua New Guinea. Book.
175	Henty. 1981. Handbooks of the Flora of Papua New Guinea Volume 2. Melbourne University Press, Carlton South, Victoria.
176	Hermanto & Faramayuda. 2017. Pengaruh Pemberian Ekstrak Air Kayu Akway (Drymis piperita Hook. f.) Pada Pertumbuhan Plasmodium falciparum Penyebab Malaria. Kartika-Jurnal Ilmiah Farmasi 5(1): 24-25.
177	Hertel. 1998. Traditional Plant Use by the Didipa Clan, Baitabang, Papua New Guinea. Book.
178	Hertiani et al. 2010. Preliminary Study on Immunomodulatory Effect of Sarang-Semut Tubers Myrmecodia tuberosa and Myrmecodia pendens. OnLine Journal of Biological Sciences 10(3): 136-141.
179	Hide et al. 1979. A Checklist of Some Plants in the Territory of the Sinasina Nimai (Simbu Province, Papua New Guinea), with Notes on Their Uses. Deptarment of Anthropology, University of Auckland.
180	Hide. 1984. The Research Report of the Simbu Land Use Project Volume VI: South Simbu: Studies in Demography, Nutrition and Subsistence. The Institute of Applied Social and Economic Research, Boroko, Papua New Guinea.
181	Hiepko & Schultze-Motel. 1981.Floristiche und ethnobotanische Untersuchungen im Eipomek-Tal, Irian Jaya (West-Neuguinea), Indonesia. Mensch, Kultur und Umwelt im zentralen Bergland von West-Neuguinea, 7.
182	Hill. 2001. Traditional paint from Papua New Guinea: Context, materials and techniques, and their implications for conservation. The Conservator 25(1): 49-61.
183	Hoffmann. 2006. Malesian Euphorbiaceae Descriptions 8. Antidesma in Malesia and Thailand, 1-292. Royal Botanic Gardens, Kew. http://www.nationaalherbarium.nl/Euphorbs/specA/Antidesma.htm. Accessed on: 28/02/2018
184	Höft. 1992. Plants of New Guinea and the Solomon Islands: Dictionary of the Genera and Families of Flowering Plants and Ferns. Wau Ecology Institute, Handbook No. 13.
185	Holdsworth & Balun. 1992. Medicinal Plants of the East and West Sepik Provinces, Papua New Guinea. International Journal of Crude Drug Research 30(3): 218-222.
186	Holdsworth & Damas. 1986. Medicinal Plants of Morobe Province, Papua New Guinea Part III: The Finschhafen Coast. International Journal of Crude Drug Research, 24 (4): 217-225.
187	Holdsworth & Kerenga. 1987. A Survey of Medicinal Plants in the Simbu Province, Papua New Guinea. International Journal of Crude Drug Research, 25(3): 183-187.
188	Holdsworth & Kerenga. 1987. Medicinal Plants of the Western Highlands, Papua New Guinea. International Journal of Crude Drug Research, 25(3): 171-176.
189	Holdsworth & Lacanienta. 1981. Traditional Medicinal Plants of the Central Province of Papua New Guinea Part II. Quarterly Journal of Crude Drug Research, 19(4): 155-167.
190	Holdsworth & Lacanienta. 1981. Traditional Medicinal Plants of the Central Province of Papua New Guinea. Quarterly Journal of Crude Drug Research, 19 (4): 141-154.
191	Holdsworth & Mahana. 1983. Traditional Medicinal Plants of the Huon Peninsula Morobe Province, Papua New Guinea. International Journal of Crude Drug Research 21 (3): 121-133.
192	Holdsworth & Rali. 1989. A Survey of Medicinal Plants of the Southern Highlands, Papua New Guinea. International Journal of Crude Drug Research, 27(1): 1-8.
193	Holdsworth & Sakulas. 1992.High Altitude Medicinal Plants of Papua New Guinea Part II*. Mount Wilhelm, Simbu Province. International Journal of Pharmacognosy 30(1): 1-4.
194	Holdsworth & Wamoi. 1982. Medicinal Plants of the Admiralty Islands, Papua New Guinea Part I. International Journal of Crude Drug Research, 20(4): 169-181.
195	Holdsworth et al. 1983. Traditional Medicinal Plants of New Ireland, Papua New Guinea. Part II. New Hanover Island. International Journal of Crude Drug Research, 21(4): 161-168.
196	Holdsworth et al. 1989. Traditional Medicinal Plants of New Ireland, Papua New Guinea. Part III. Konos, Central New Ireland. International Journal of Crude Drug Research, 27(1): 55-61.
197	Holdsworth, D.K. 1977. Medicinal Plants of Papua New Guinea. South Pacific Commission.
198	Holdsworth, D.K. 1980. Traditional Medicinal Plants of New Ireland, Papua New Guinea. Quarterly Journal of Crude Drug Research, 18(3): 131-139.
199	Holdsworth. 1980. Traditional Medicinal Plants of the North Solomons Province Papua New Guinea. International Journal of Crude Drug Research 18(1): 33-44.
200	Holdsworth. 1984. Phytomedicine of the Madang Province, Papua New Guinea. Part I. Karkar Island. International Journal of Crude Drug Research 22(3): 111-119.
201	Holdsworth. 1987. Medicinal Plants of the Central Province of Papua New Guinea: Part IV. The Goilala Mountain People. International Journal of Crude Drug Research 25(4): 231-235.
202	Holdsworth. 1987. Medicinal Plants of the Morobe Province, Papua New Guinea: Part V. The Upper Watut. International Journal of Crude Drug Research, 25(4): 225-230.
203	Holdsworth. 1989. High Altitude Medicinal Plants of Papua New Guinea. International Journal of Crude Drug Research 27(2): 95-100.
204	Holdsworth. 1991. Medicinal Plants of the Central Province of Papua New Guinea: Part V. Coastal Villages to the West and East of Port Morseby. International Journal of Pharmacognosy 29(3): 231-236.
205	Holdsworth. 1992. Medicinal Plants of the Gazelle Peninsula, New Britain Island, Papua New Guinea. Part I. International Journal of Pharmacognosy 30(3): 185-190.
206	Holdsworth. 1993. Medicinal Plants of the Gazelle Peninsula, New Britain Island, Papua New Guinea. Part II. International Journal of Pharmacognosy 31(1): 19-22.
207	Holdsworth. 1993. Medicinal Plants of the Oro (Northern) Province of Papua New Guinea. International Journal of Pharmacognosy 31(1): 23-28.
208	Holttum. 1967. The Bamboos of New Guinea. Kew Bulletin 21(2): 263-292.
209	Holttum. 1981. Flora Malesiana Series 2: Part 1-5.
210	Hopkins. 2018. The taxonomy and morphology of Schizomeria (Cunoniaceae) in New Guinea, the Moluccas and the Solomon Islands, with notes on seed dispersal and uses throughout the genus. Kew Bulletin 73(1): 11.
211	Howay et al. 2003. Pemanfaatan tumbuhan Sebagai Obat Tradisional Oleh Masyarakat Suku Maibrat Di Kampung Sembaro Distrik Ayamaru Kabupaten Sorong (Utilisation of Plants as Traditional Medicines by Maibrat Tribe in Sorong). Beccariana 5(1): 24-34.
212	Hymowitz & Boyd. 1977. Origin, Ethnobotany and Agricultural Potential of the Winged Bean: Psophocarpus tetragonolobus. Economic Botany 31: 180-188.
213	Hyndman D. C. & Frodin D. G. 1980. Ethnobotany of Schefflera in the Ok Tedi Region, Papua New Guinea. Book.
214	Hyndman D. C. 1984. Ethnobotany of Wopkaimin Pandanus: Significant Papua New Guinea Plant Resource. Economic Botany 38(3): 287-303.
215	Imbiri et al. 2000.Ekologi Rumput Kebar Biophytum petersianum Klotzsch. Di Kecamatan Kebar, Manokwari, Irian Jaya (An Ecological Aspect of Biophytum petersianum Klotzsch. In Kebar Distric, Manokwari, Irian Jaya). Beccariana, 2(2): 44-47.
216	Inama. 2008.Kajian etnobotani masyarakat suku marind sendawi anim di kawasan taman nasional wasur, kabupaten merauke, propinsi papua. Departemen Konservasi Sumberdaya Hutan Dan Ekowisata Fakultas Kehutanan Institut Pertanian Bogor.
217	Indaryani. 2002. The utilization of traditional medicine plants by Wondama tribe in Manokwary regency. Beccariana 4(1): 56-67.
218	Jadhav et al. 2009. Traditional medicinal uses of Hibiscus rosa-sinensis. Journal of Pharmacy Research 2(8): 1220-1222.
219	Jeffries. 1979. Report No. 1 From Kaukau to Coke: A Study or Rural and Urban Food Habits in Papua New Guinea. Book.
220	Jensen. 2001. Trees and Fruits of Southeast Asia: An Illustrated Field Guide. Book.
221	Johannes. 1975. Medicinal Plants of the Nekematigi of the Eastern Highlands. Economic Botany 29(3): 268-277.
222	Johannes. 1986. Medicinal Plants of the New Guinea Highlands: an Ethnopharmacologic and Phytochemical Update. In: Plants in Indigenous Medicine and Diet: Biobehavioural Approaches.
223	Johns. 1989. The flowering plants of Papuasia Dicotyledons: Part 3 Caryophyllidae. Book.
224	Jorim et al. 2012. An ethnobotanical survey of medicinal plants used in the eastern highlands of Papua New Guinea. Journal of Ethnobiology and Ethnomedicine 8: 47.
225	Juillerat. 1984. D'Acorus à Zingiber: taxinomie et usages des plantes cultivées chez les Yafar de Nouvelle-Guinée. Journal d'agriculture traditionnelle et de botanique appliquée no. 1-2: 3-31.
226	Junaidi & Sawen. 2010. Keragaman Botanis Dan Kapasitas Tampung Padang Penggembalaan Alami Di Kabupaten Yapen. Jurnal Ilmu Peternakan Dan Veteriner 5(2): 92-97.
227	Kalkman & Nooteboom. 1998.Flora Malesiana Series 2: Volume 3.
228	Kalkman et al. 1997. Flora Malesiana Series 1: Volume 13.
229	Kameubun et al. 2012. Hubungan Antara Budaya Suku Marind Dengan Konservasi Tanaman Wati (Piper methysticum Forst.) Di Merauke, Papua Selatan. In Dewan Redaksi (Reviewer) Prosiding Seminar Ilmiah se-Eropa Bidang Ekologi, Konservasi Sumberdaya Alam, Lingkungan, Iklim, Ilmu-ilmu Keteknikan dan Matematik.
230	Kameubun. 2014. Indigenous knowledge, morphological variation and genetic diversity of Kava (Piper methysticum Forst.) in Merauke, Papua, Indonesia. PhD thesis, Göttingen, Georg-August-Universität.
231	Kanro et al. 2003. Tanaman sagu dan pemanfaatannya di propinsi papua. Jurnal Penelitian dan Pengembangan Pertanian 22 (3):116-124.
232	Karim & Sismindari. 2011. Antiproliferatif Ekstrak Metanol Daun Dianella nemorosa Lam. (Liliaceae) terhadap Sel Kanker MKN45 dengan Menggunakan Metode WST-1. Jurnal Biologi Papua 3 (2): 47-52.
233	Keim & Dransfield. 2012. A monograph of the genus Orania (Arecaceae- Oranieae). Kew Bulletin 67: 127-190.
234	Keim. 2009. Pandanaceae of the island of Yapen, Papua (West New Guinea), with their nomenclature and notes on the rediscovery of Sararanga sinuosa, and several new species and records. Blumea 54, 255-266.
235	Keim. 2012. The Pandan Flora of Foja-Mamberamo Game Reserve and Baliem Valley, Papua-Indonesia. Reinwardtia 13 (3): 271-297.
236	Koch et al. 2015. An ethnobotanical survey of medicinal plants used in the East Sepik province of Papua New Guinea. Journal of Ethnobiology and Ethnomedicine 11: 79.
237	Kogoya et al. 2014. Bioactive Components of Pandan’s Fruits from Jayawijaya Mountains, Papua, Indonesia. Journal of Environmental Science, Toxicology and Food Technology 8(8): 1-8.
238	Kogoya et al. 2014. Pandans Diversity in Mts. Jayawijaya Papua Indonesia. Journal of Natural Sciences Research.
239	Kostermans. 1969. A New Guinea Cinnamon Used As A Contraceptive. Reinwardtia 7(5): 539-541.
240	Kress. 1990. The Taxonomy of Old World Heliconia (Heliconiaceae). Allertonia 6(1): 1-58.
241	Krey. 1998. Teknik Pembibitan Dan Penanaman Sagu (Metroxylon spp.) Secara Tradisional Oleh Penduduk Asli Sentani Di Kabupaten Dati Ii Jayapura. Fakultas Pertanian Universitas Cenderawasi Manokwari.
242	Kumar et al. 2012. Potential antifertility agents from plants: A Comprehensive review. Journal of Ethnopharmacology 140: 1-32.
243	Kusmana et al. 2003. Jenis-jenis pohon mangrove di teluk bintuni, papua. Fakultas kehutanan institut pertanian bogor dan pt bintuni utama murni wood industries.
244	Kuswantoro. 2015. Mengenal Jeringau (Acorus calamus L.) Tumbuhan Akuatik dengan Berbagai Manfaat Obat dan Budaya. Warta Konservasi Latan Basah (Wetlands International) 23 (2): 18-19.
245	La Hisa et al. 2016.Etnobotani Masyarakat Suku Marori di Kabupaten Merauke, Papua. Book.
246	Lane-Poole. 1925. Forest resources of Papua and New Guinea. Book.
247	Lanoeroe. 2005. The use of vascular plants as traditional boat raw material by Yachai tribe in Mappi Regency. Biodiversitas 6(3): 212-216.
248	Lansky et al. 2008. Ficus spp. (fig): Ethnobotany and potential as anticancer and anti-inflammatory agents. Journal of Ethnopharmacology 119: 195-213.
249	Larson et al. 2014. Interactions of Papua New Guinea medicinal plant extracts with antiretroviral therapy. Journal of Ethnopharmacology 155: 1433-1440.
250	Laufa. 2009. Sago research in Pacific Island Countries and Southeast Asia-A Review. South Pacific Studies 29 (2): 29-47.
251	Lemmens & Bunyapraphatsara (Eds). 2003. Plant Resources of South-East Asia No. 12(3) Medicinal and poisonous plants 3. Book.
252	Lemmens et al., (Eds.). 1995. Plant Resources of South-Easr Asia No. 5 (2) Timber trees: Minor commercial timbers. Book.
253	Lense. 2011. Biological screening of selected traditional medicinal plant species utilized by local people of Manokwari, West Papua Province. Nusantara Bioscience 3 (3): 145-150.
254	Lense. 2012. The wild plants used as traditional medicines by indigenous people of Manokwari, West Papua. Biodiversitas 13 (2): 98-106.
255	Leonard et al. 2003. Pemanfaatan Tumbuhan Dalam Ekosistem Mangrove Oleh Masyarakat Di Kampung Senebuay Distrik Rumberpon Kabupaten Manokwari (The use of Plants from Mangrove Forest by Local People in Senebuay Village District of Rumberpon Manokwari). Beccariana 5 (2): 97-108.
256	Lestari et al. 2015. Toxicity and phytochemistry test of methanol extract of several plants from papua using Brine Shrimp Lethality Test (BSLT). Journal of Chemical and Pharmaceutical Research 7 (4): 866-872.
257	Liem. 2013. Isolasi Senyawa Saponin dari Mangrove Tanjang (Bruguiera gymnorrhiza) dan Pemanfaatannya sebagai Pestisida Nabati pada Larva Nyamuk. Jurnal Biologi Papua 5 (1): 29-36.
258	Limbongan & Malik. 2009. Peluang pengembangan buah merah (Pandanus conoideus Lamk.) di provinsi Papua. Jurnal Litbang Pertanian 28(4): 134-141.
259	Linthin. 2000. Identifikasi jenis-jenis vegetasi sebagai pakan kuskus di pulau moor kecamatan napan weinami kabupaten nabire. Fakultas Pertanian Universitas Cenderawasi Manokwari.
260	Liwang. 2010. Pemanfaatan jenis kayu sebagai bahan baku pembuatan perahu tradisional di pulau Ambai, Papua.Jurnal Tropica.
261	Mabberley, Pannell & Sing. 1995. Flora Malesiana Series 1: Volume 12 (1).
262	Mabel et al. 2016. Identifikasi Dan Pemanfaatan Tumbuhan Obat Suku Dani Di Kabupaten Jayawijaya Papua. Jurnal Mipa Unsrat Online,5 (2): 103-107.
263	Macap. 2013. Etnobotani pangan suku Matbat di pulau Misool kabupaten Raja Ampat Papua Barat. Departemen konservasi sumberdaya hutan dan ekowisata fakultas kehutanan institut pertanian Bogor.
264	Macfarlane. 1963. The Pain-Producing Properties of the Stinging Tree, Laportea.in: Venomous and Poisonous Animals and Noxious Plants of the Pacific Region.
265	Macklin & Parnell. 2016. Dendromyza hiepkoana sp. nov. from Irian Jaya and D. staufferi sp. nov. from Papua New Guinea (Amphorogynaceae). Nordic Journal of Botany 34, 169-173.
266	Mahmud et al. 2017. Scenarios of Land-Use Change in Protected Forest of Wosi Rendani Manokwari District, West Papua, Indonesia. Jurnal Manajemen Hutan Tropika 23 (1): 8-15.
267	Mahmud. 2011. Vegetasi Mangrove sebagai Bahan Makanan pada Empat Suku di Papua (Mangrove Vegetation as Foods amongst Ethnics in Papua). Biota 16 (1): 88-94.
268	Maima. 1996. Processing of Galip (Canarium indicum) in Papua New Guinea.in: Stevens, M. L., Bourke, R. M. and Evans, B. R., ed. 1996. South Pacific Indigenous Nuts. Proceedings of a workshop held from 31 October to 4 November 1994 at Le Lagon Resort, Port Vila, Vanuatu. ACIAR Proceedings No. 69: 118-121
269	Mamoribo et al. 2003. Pemanfaatan Vegetasi Mangrove Oleh Masyarakat Kampung Rayori Di Distrik Supiori Selatan Kabupaten Biak Numfor (Utilisation of Mangrove by the Community in Kampong Rayori, South Supiori, Biak Numfor). Beccariana 5(1): 43-51.
270	Mangera. 2011. Analisis Vegetasi Jenis Pohon Di Kawasan Hutan Kampung Wasur Pada Taman Nasional Wasur Distrik Merauke Kabupaten Merauke. Agricola 1 (1): 18-35.
271	Marasinghe. 2016. Ethnochemistry and Ethnomedicine of Ancient Papua New Guineans and Their Use in Motivating Students in Secondary Schools and Universities in PNH. Universal Journal of Educational Research 4(7): 1724-1726.
272	Mardany et al. 2016. Skrining Fitokimia dan Uji Aktivitas Sitotoksik dari Tumbuhan Sarang Semut (Myrmecodia beccarii Hook.f.) Asal Kabupaten Merauke. Jurnal Biologi Papua 8 (1): 13-22.
273	Marwa et al. 2013. Potential and pattern of utilization of Renewable Energy sources from vegetation based on local knowledge of Ireres tribe in Tambrauw, West Papua, Indonesia. Indian Journal of Traditional Knowledge 12 (2): 411-417.
274	Matthews & Gosden. 1997. Plant Remains from Waterlogged Sites in the Arawe Islands, West New Britain Province, Papua New Guinea: Implications for the History of Plant Use and Domestication. Economic Botany 51(2): 121-133.
275	Maturbongs. 2000. Etnobotani suku Tepin di pulau Salawati kabupaten dati Sorong, Irian Jaya. Beccariana 2(2): 38-43.
276	May. 1984. Kaikai Aniani: A guide to bush foods markets and culinary arts of Papua New Guinea. Book.
277	Mebs. 2000. Notes on the traditional use of plants to treat snake bite in northern Papua New Guinea. Toxicon 38: 299-302.
278	Middleton. 2007. Flora Malesiana: Apocynaceae. Series 1: Volume 18.http://portal.cybertaxonomy.org/flora-malesiana/cdm.dataportal/taxon/68794e01-eb53-4cf4-8eb8-5d7ca06dfab8
279	Miklouho-Maclay. 1886. List of plants in use by the natives of the Maclay-coast, New Guinea. Proceedings of the Linnean Society of New South Wales 10: 346-358.
280	Milliken. 1994. Ethnobotany of the Yali of West Papua. Edinburgh: Royal Botanic Garden.
281	Modouw. 2006. Struktur dan komposisi hutan pamah pengunungan Cyclops serta pemanfaatan kayu Xanthostemon spp., oleh masyarakat etnis Sentani Jayapura Papua (The structure and composition of the Cyclops Mountains pamah forest and the conservation and use of the wood of Xanthostemon spp., by the Sentani ethnic community at Jayapura in Papua). Universitas Indoneisa, Fakultas Matematika Dan Ilmu Peng…
282	Mom et al. 2015. Studi Ethnbotani Tumbuhan Daun Gatal Di Kecamatan Kwamkilama Kabupaten Mimika. COCOS, 6 (14).
283	Morren & Frodin. 1992. A preliminary vernacular guide to the vegetation of northern Telefomin district, Papua New Guinea. Department of Human Ecology Research Paper/New Jersey Agricultural Experiment Station Publication P-26501-1-92. New Brunswick, N.J., Rutgers, The State University of New Jersey.
284	Motley, T. J. 2004. The ethnobotany of Fagraea Thunb.(Gentianaceae): The timber of Malesia and the scent of Polynesia. Economic Botany 58(3): 396–409.
285	Mudlofar. 2012. Analisis Komposisi Minyak Atsiri Fuli Dan biji Pala Papua (Myristica argentea Warb) Dengan GC-MS.Fakultas Teknologi Pertanian Institut Pertanian Bogor.
286	Muller. 2004. Utekini: A Valley of Bloodshed Springs New Life (or) Pandanus Project: Appropriate Technology in Irian Jaya. Papuaweb.http://papuaweb.org/dlib/tema/amungme/muller/index.html
287	Muller. 2005. The Biodiversity in New Guinea.http://www.papua.wz.cz/bio2.htm
288	Mulyaningsih & Yamada. 2007. Notes on Some Species of Agarwood in Nusa Tenggara, Celebes and West Papua.in: Natural Resource Management and Socio-Economic Transformation under the Decentralization in Indonesia: Toward Sulawesi Area Studies.
289	Murtiningrum et al. 2011. Sifat Fisik dan Komposisi Kimia Umbi Dua Spesies Sarang Semut (Myrmecodia) Asal Papua.Jurnal Agrotek 5 (5): 14-19.
290	Nega et al. 2003. Eksplorasi Jenis Palem Pada Kawasan Hutan Dataran Rendah Bayeda Distrik Teluk Arguni (Exploration of Species in the Lowland Forest of Bayeda Distract Teluk Arguni). Beccariana, 5 (2): 67-81.
291	Ngutra. 2011. Identifikasi dan analisis ekonomi keanekaragaman hayati tumbuhan Sowang (Tumbuhan Endemik di Pegunungan Cycloops Kabupaten Jayapura Papua). Sekolah pascasarjana institut pertanian Bogor.
292	Nick et al. 1995. Biological screening of traditional medicinal plants from Papua New Guinea. J Ethnopharmacology 49 147-156.
293	Nielsen. 1992. Flora Malesiana. Series 1: Volume 11 Part 1.
294	Nombo & Leach. 2010. Reite plants: an ethnobotanical study in Tok Pisin and English. Book.
295	Noor et al. 2012. Panduan Pengenalan Mangrove di Indonesia. Book (3rd edition).
296	Nooteboom & van Welzen. 2013. Flora Malesiana. Series 1: Volume 21.
297	Nooteboom. 2002. Flora Malesiana. Series 1: Volume 16.
298	Nooteboom. 2012. Flora Malesiana. Series 2: Volume 4.
299	Novotny & Toko. 2014. Ecological research in Papua New Guinean rainforests: insects, plants and people. In: The State of the Forests of Papua New Guinea.
300	Nugroho et al. 2015. Traditional Pig farming practices and productivity in the Jayawijaya region, Papua province, Indonesia. Tropical Animal Health and Production 47(3): 495-502.
301	Nurapriyanto et al. 2005. Sistem pengusahaan beberapa hasil hutan bukan kayu dan alur tataniaganya di Jayapura, Papua. Penelitian Sosial Ekonomi dan Kebijaken Kehutanan. Jayapura.
302	Ogo et al. 1987. Plant Species Used in Papua New Guinea and Solomon Islands. Japanese Journal of Tropical Argiculture 31(1): 16-27.
303	Ohtsuka et al. 1987. Sodium-Rich Tree Ash as a Native Salt Source in Lowland Papua. Economic Botany 41(1): 55-59.
304	Ohtsuka. 1994. Subsistence ecology and carrying capacity in two Papua New Guinea Populations. Journal of Biosocial Science 26, 395-407.
305	Oomen. 1971. Ecology of Human Nutrition in New Guinea: evaluation of subsistence patterns. Ecology of Food and Nutrition 1: 1-16.
306	Oyen & Nguygen Xuan Dung (Eds). 1999. Plant Resources of South-East Asia No. 19 Essential-oil plants.
307	Paisey. 2008. Kajian morfologi dan kimia kayu akway (Drymis sp) sebagai afrodisiak endemik Papua. Sekolah pascasarjana institut pertanian Bogor.
308	Palupi & Martosupono. 2009. Buah Merah: Potensi Dan Manfaatnya Sebagai Antioksidan (Red fruit: Its Potency and Benefit as Antioxidant). Jurnal Tumbuhan Obat Indonesia 2(1): 42-48.
309	Pamassangan. 2012. Pentingnya lanskap hutan dan keragaman tumbuhan menurut persepsi masyarakat adat ibele kabupaten jayawijaya.Fakultas Kehutanan Universitas Negeri Papua Manokwari.
310	Pangau-Adam & Mühlenberg. 2014. Dispersal of Terminalia seeds by the Northern Cassowary in the lowland forest of Papua, Indonesia. Asian Journal of Conservation Biology, 3 (2): 115-119.
311	Pangau-Adam & Mühlenberg. 2014. Palm Species in the Diet of the Northern Cassowary (Casuarius unappendiculatus) in Jayapura Region, Papua, Indonesia. Palms 58(1): 19-26.
312	Panoff. 1970. Maenge Remedies and Conception of Disease. Ethnology 9(1): 68-64.
313	Partomihardjo & Rugayah. 1989. Pang (Pangium edule reinw.) dan potensinya yang mulai dilupakan (Pangium edule, an Almost Forgotten Plant and Its Potential). Media Konservasi, 2(2): 45-50.
314	Parubak. 2013. Senyawa Flavonoid Yang Bersifat Antibakteri Dari Akway (Drimys becariana. Gibbs). Chemistry Progress, 6 (1): 34-37.
315	Pattiselanno et al. 2004. Preliminary study on traditional pig raising by local communities at upland Kebar, Manokwari, West Papua.
316	Pattiselanno et al. 2009. Grazing Habitat of the Rusa Deer (Cervus timorensis) in the Upland Kebar, Manokwari. Biodiversitas 10(3): 134-138.
317	Pattiselanno. 2008. Man-Wildlife interaction: Understanding the concept of conservation ethnics in Papua. Tiger Paper 35 (4): 10-12.
318	Pelomo et al. 1996. Canarium Nut and Oil Marketing in Solomon Islands.in: Stevens, M. L., Bourke, R. M. and Evans, B. R., ed. 1996. South Pacific Indigenous Nuts. Proceedings of a workshop held from 31 October to 4 November 1994 at Le Lagon Resort, Port Vila, Vanuatu. ACIAR Proceedings No. 69, 176: 76-78
319	Percival & Womersley. 1975. Floristics and Ecology of the Mangrove Vegetation of Papua New Guinea. Book.
320	Petir et al. 1997. Useful Plants of Salemben Village, Madang Province, Papua New Guinea. Book.
321	Petoe et al. 2018. A monograph of the Hydriastele wendlandiana group (Arecaceae: Hydriastele). Kew Bulletin 73 (1): 17.
322	Plarre. 1984. Clonal variability in taro in the central highlands of Irian Jaya. In: Edible Aroids, pg. 173-177
323	Plarre. 1995. Review: Evolution and variability of special cultivated crops in the highlands of West New Guinea (Irian Jaya) under present Neolithic conditions. Plant Genetic Resources Newsletter 103: 1-13.
324	Pleydell. 1970. Timbers of the British Solomon Islands. Book.
325	Pouwer. 2010. Gender, ritual and social formation in West Papua: A configurational analysis comparing Kamoro and Asmat. Book.
326	Powell. 1976. Ethnobotany. In: New Guinea Vegetation, Paijmans.
327	Powell. 1982. The history of plant use and man's impact on the vegetation.in: Biogeography and Ecology of New Guinea-Part 2.
328	Prescott et al. 2012. Comparative ethnobotany and in-the-field antibacterial testing of medicinal plants used by the Bulu and inland Kaulong of Papua New Guinea. Journal of Ethnopharmacology 139, 497-503.
329	Prescott et al. 2015. Medicinal plants of Papua New Guinea's Miu speaking population and a focus on their use of plant-slaked lime mixtures. Journal of Ethnopharmacology 174: 217-223.
330	Prescott et al. 2017. Tropical ulcer plant treatments use by Papua New Guinea's Apsokok nomads. Journal of Ethnopharmacology 205: 240-245.
331	Prima. 2002. Studi etnobotani tumbuhan obat masyarakat kamoro di dataran rendah PT Freeport Indonesia, kabupaten Mimika, Papua.
332	Priyono. 2008. Potensi antibakteria ekstrak dan fraksi libo (Piper miniatum BL). Berita Biologi 9(1): 99-103.
333	Purwanto. 2002. Gestion de la biodiversite: relations aux plantes et dynamiques vegetales chez les dani de la vallee de la Baliem en irian jaya, indonesie. Reinwardtia 12(1): 1-94.
334	Purwanto. 2003. Studi etnoekologi masyarakat dani-baliem dan perubahan lingkungan dilembah baliem, jayawijaya, irian jaya. Berita Biologi, 6(5): 661-678.
335	Rahawarin. 2017. Non-timber products extracted activities of the upstream Mamberamo basin's traditional communities of West Papua, Indonesia. Asian Journal of Forestry 1 (1): 23-26.
336	Rahayu. 2011. Hoya Sebagai Tumbuhan Obat. Warta Kebun Raya 11 (1): 15-20.
337	Rahayu. 2013. Ekstrak sarang semut (Hydnophytum formicarum) dan potensinya sebagai antihiperglikemik.departemen teknologi hasil perairan fakultas perikanan dan ilmu kelautan institut pertanian Bogor.
338	Rali et al. 2007.Volatile Chemical Constituents of Piper aduncum L and Piper gibbilimbum C. DC (Piperaceae) from Papua New Guinea. Molecules 12: 389-394.
339	Rao. 1996. Antibacterial activity of some medicinal plants of Papua New Guinea. International Journal of Pharmacognosy 34 (3): 223-225.
340	Rappaport. 1968. Pigs for the Ancestors: Ritual in the ecology of a New Guinea people.Yale University Press.
341	Rawaharin. 2005. Inventory of palm species in Mioswaar island, Teluk Wondama Regency, West Irian Jaya (Papua). Biodiversitas 6(2): 108-112.
342	Remetwa. 2012. Kearifan masyarakat lokal kampung rotea dalam pemanfaatan hasil hutan bukan kayu (HHBK) Nabati sebagai bahan makanan dan obat-obatan di distrik bonggo kabupaten sarmi.Jurusan Budidaya Hutan Fakultas Kehutanan Universitas Negeri Papua Manokwari.
343	Renyoet et al. 2011. Uji Teratogen Ekstrak Akar Jarong (Stachytarpheta jamaicensis (L.) Vahl.) terhadap Sistem Reproduksi Mencit (Mus musculus L.) Betina. Jurnal Biologi Papua 3(1): 32-38.
344	Rezeki et al. 2012. Observasi Klinis Seduhan Serbuk Kulit Batang Kayu Susu (Alstonia scholaris (L.) R. Br.) Sebagai Antimalaria Di Manokwari Clinical Observation Of Steeping Powder Milky Wood Cortex (Alstonia scholaris (L.) R. Br.) As Antimalarial In Manokwari.Journal of Pharmaceutics and Pharmacology 1 (2): 95-103.
345	Richards & Suryadi. 2002. Biodiversity Assessment of Yongsu-Cyclops Mountains and the Southern Mamberamo Basin, Papua, Indonesia. RAP Bulletin of Biological Assessment, 25.
346	Richards & Whitmore. 2015. A Rapid Biodiversity Assessment of Papua New Guinea's Hindeburg Wall Region.Wildlife Conservation Society Papua New Guinea Program. Goroka, PNG.
347	Roham et al. 2010. Antioxidant activity, total phenolic, and total flavonoid of extracts and fractions of red fruit (Pandanus conoideus Lam). International Food Research Journal 17, 97-106.
348	Roreng & Nishigaki. 2013. Buah Merah dan Penduduk Papua. Warta IHP, 30 (1): 37-48.
349	Rumbiak. 2001. Pemanfaatan palem oleh masyarakat etnik Wondama di Tandia Kecamatan Wasior-Manokwari. Beccariana 3(2): 31-37.
350	Sada et al. 2010. Keragaman Tumbuhan Obat Tradisional di Kampung Nansfori Distrik Supiori Utara, Kabupaten Supiori–Papua. Jurnal Biologi Papua 2(2): 39-46.
351	Sam et al. 2005. Ethnobotany of Penis Sheaths (Phallocrypts) in Papua New Guinea. Botanical Electronic News, 490.
352	Saragih et al. 2010. The diet of spotted cuscus (Spilocuscus maculatus) in natural and captvity habitat. Nusantara Bioscience 2 (2): 78-83.
353	Saragih. 2008. Kohabitasi Antara Walabi Lincah (Macropus agilis papuanus Peters and Doria, 1875) Dan Rusa Timor (Cervus timorensis de Blainville, 1822) Di Savana Campuran Udiudi Sptn Iii Taman Nasional Wasur, Papua. Departemen Konservasi Sumberdaya Hutan Dan Ekowisata Fakultas Kehutanan Institut Pertanian Bogor.
354	Sari. 2015. Perilaku lek, perilaku harian, dan karakteristik habitat burung hibrida cendrawasih kuning besar (Paradisaea apoda) x cendrawasih raggiana (Paradisaea raggiana) di taman nasional Wasur Merauke, Papua. Sekolah pascasarjana institut pertanian Bogor.
355	Sarimole et al. 2014. Pengobatan penyakit malaria dengan menggunakan beberapa jenis tumbuhan nabati di kabupaten Raja Ampat. Prosiding seminar nasional Raja Ampat, Waisai – 12 – 13 agustus 2014.
356	Sarimole. 2014. Pemanfaatan tumbuhan hutan sebagi obat tradisional masyarakat di kampung Yenbekwan, distrik Mansuar, kabupaten Raja Ampat. Prosiding seminar nasional Raja Ampat, Waisai 12–13 agustus 2014.
357	Sarungallo et al. 2016. Nutrient content of three clones of red fruit (Pandanus conoideus) during the maturity development. International Food Research Journal 23 (3): 1217-1225.
358	Saulei & Aruga. 1994. The status and prospects of non-timber forest products development in Papua New Guinea. The Commonwealth Forestry Review 73(2): 97-105.
359	Sawan. 2014. Potensi tanaman obat banondit (Biophytum petersianum Klotzsch) sebagai sumber pakan hijauan di lembah kebar Papua Barat. Pastura 2(1): 34-36.
360	Sawen. 2011. Pengamatan Ekologi Padang Rumput Alam Kebar Papua Dan Uji Produktivitas Banondit (Biophytum petersianum Klotzsch) Melalui Pemberian Nitrogen Dan Interval Defoliasi. Sekolah Pascasarjana Institut Pertanian Bogor.
361	Schmid. 1991. Of People and Plants: A Botanical Ethnography of Nokopo Village, Madang and Morobe Provinces, Papua New Guinea. Book: Ethnologisches Seminar der Universität und Museum für Völkerunde Basal.
362	Schneider & Yaku. 1996. Conservation for development: the relevance of indigenous rootcrop knowledge in Irian Jaya In: Into Action Research: Partnerships in Asian Rootcrop Research and Development.
363	Seebaluck et al. 2015. Medicinal plants from the genus Acalypha (Euphorbiaceae)-A review of their ethnopharmacology and phytochemistry. Journal of Ethnopharmacology 159: 137-157.
364	Sembori. 2009. Inventarisasi Jenis Tumbuhan Pangan Lokal pada Masyarakat Ambaidiru Distrik Kosiwo, Kabupaten Yapen Waropen. Jurnal Biologi Papua 1(1): 36-41.
365	Setyawan. 2009. Traditionally utilization of Selaginella; field research and literature review. Bioscience 1(3): 146-158.
366	Sheil et al. 2004. Building capacity for Multidisciplinary Landscape Assessment in Papua: three phases of training and pilot assessments in the Mamberamo Basin. Center for International Forestry Research, Conservation International (Papua Program): Lembaga Ilmu Pengetahuan Indonesia (LIPI).
367	Siarudin et al. 2016. Potensi produksi daun dan minyak kayu putih jenis Asteromyrtus symhpyocarpa di Taman Nasional Wasur. Jurnal Hutan Tropis 1(3): 1-7.
368	Siemonsma & Piluek (Eds.). 1993. Plant Resources of South-East Asia No. 8 Vegetables. Book.
369	Sillitoe. 1980. Confusions in the classifications: How the Wola name their plants. Ethnos 45 (3-4): 133-156.
370	Sillitoe. 1983. Roots of the earth: Crops in the Highlands of Papua New Guinea. Book.
371	Sillitoe, P. 1995. An ethnobotanical account of the plant resources of the Wola region, Southern Highlands Province, Papua New Guinea. Journal of Ethnobiology 15: 201-236.
372	Sillitoe. 2002. Archaic Crop or Awkward Crop? Taro Cultivation in the Southern Highlands Province of Papua New Guinea. JCAS Symposium Series 16: 165-194.
373	Sillitoe. 2003. The Gender of Crops in the Papua New Guinea Highlands.in: Howard (2003) Women and Plants. Gender Relations in Biodiversity Conservation and Management. London, Zed Books. Chapter 9
374	Simaremare. 2014. Skrining Fitokimia Ekstrak Etanol Daun Gatal (Laportea decumana (Roxb.) Wedd). Pharmacy 11 (1): 98-107.
375	Simbiak. 2007. The Marantaceae Petersen in Western New Guinea. Department of Biology The Graduate School Bogor Agricultural University.
376	Sinery. 2006. Jenis Kuskus di Taman Wisata Gunung Meja Kabupaten Manokwari, Irian Jaya Barat. Biodiversitas 7 (2): 175-180.
377	Sinery. 2012. The population condition and availability of feed of cuscus in the Arfak Mountain Nature Reserve, West Papua. Biodiversitas 13 (2): 86-91.
378	Sinery. 2013. Population dynamics of cuscus in tourist island of Ahe, District of Nabire, Papua. Biodiversitas 14 (2): 95-100.
379	Sirami. 2010. Marero (Lumnitzera littoralis) Kayu Adat Orang TAMAKURI. Lahan Basah 18 (1): 20-21.
380	Sirami. 2010. Pohon Buah Hitam (Haplolobus spp.) Apa Keistimewaannya bagi Masyarakat Pesisir Teluk Wondama. Warta Konservasi Latan Basah (Wetlands International 18 (2): 20-21.
381	Sirami. 2014. Maighian [Toona sureni (Blume) Merr.] Kayu Perahu Nomor Satu Orang Waropen Bagian. Warta Konservasi Latan Basah (Wetlands International 22 (2): 13-14.
382	Siri von Reis Altschul. 1973. Drugs and foods from little-known plants. Harvard University Press.
383	Sitepu et al. 2011. Fragrant wood Gaharu: When the wild can no longer provide. Ministry of Forestry on Indonesia in Cooperation with International Tropical Timber Organisation.
384	Sitorus. 1997. Analisa pemanfaatan bambu di daerah transmigrasi desa margorukun kecamatan oransbari kabupaten manokwari.Jurusan Kehutanan Program Studi Manajemen Hutan, Fakultas Pertanian Universitas Cenderawasih, Manokwari.
385	Skingle. 1970. Some Medicinal Herbs Used by the Natives of New Guinea. Mankind 7(3): 223-225.
386	Smith. 1996. People-plant interactions in the New Guinea highlands: agricultural heartland or horticultural backwater?.in: The origins and spread of agriculture and pastoralism in Eurasia (Harris, 1996).
387	SMK Forestry Students. 2014. Bahan Pewarna Alami Kayu Asal Kampungmbenti Distrik Minyambouw Kabupaten Manokwari.
388	Snow. 2012. Five new species of Rhodamnia (Myrtaceae, Myrteae) from New Guinea. PhytoKeys 19, 31-49.
389	Soares et al. 2005. Medicinal Plants with Inhibitory Properties Against Snake Venoms. Current Medicinal Chemistry 12: 2625-2641.
390	Soeksmanto et al. 2010. Anticancer Activity Test for extracts of Sarang Semut Plant (Myrmecodya pendens) to HeLa and MCM-B2 Cells. Pakistan Journal of Biological Sciences 13 (3): 148-151.
391	Soerianegara & Lemmens (Eds.). 1993. Plant Resources of South-East Asia No. 5(1) Timber trees: Major commercial timbers. Book.
392	Sosef et al. 1998. Plant Resources of South-East Asia No. 5 (3) Timber trees: Lesser-known timbers. Book.
393	SP3T. 2016. Tumbuhan Obat Tradisional Papua Berdasarkan Kearifan Lokal Masyarakat. Dinas Kesehatan Provinsi Papua Sentra Pengembangan Dan Penerapan Pengobatan Tradisional (Sp3t).
394	Stewart & Strathern. 2002. The Cultivation and Use of Taro and Fruit Pandanus among the Duna of the Aluni Valley in the Southern Highlands Province of Papua New Guinea, with Comparative Notes. JCAS Symposium Series 16: 233-245.
395	Stöcklin. 1986. Plants in traditional medicine: medical concepts of the Abelam people in Papua New Guinea: short communication. Acta Tropica 43: 187-189.
396	Stone. 1984. Pandanus from Ok Tedi Region, Papua New Guinea, Collected by Debra Donoghue. Economic Botany, 38(3): 304-313.
397	Stopp. 1963. Medicinal Plants of the Mt. Hagen People (Mbowamb) in New Guinea. Economic Botany 17(1): 16-22.
398	Suharno et al. 2015. Usaha Domestifikasi Tumbuhan Pokem (Setaria Italica (L.) Beauv) Masyarakat Lokal Pulau Numfor, Kabupaten Biak Numfor Sebagai Upaya Menunjang Ketahanan Pangan Nasional (The Effort of Domestication of Pokem (Setaria italica (L.) Beauv) by Local Communities at Numfor Island, Biak Numfor Regency in Supporting National Food Security). Jurnal Manusia dan Lingkungan 22 (1): 73-83.
399	Suharno. 2016. Wati (Piper methysticum) medicinal plant: The ethnobiological and ethnomedicinal values of the Marind tribe in Merauke, Papua, Indonesia. Biodiversitas 17 (2): 814-822.
400	Suma. 2001. Pemanfaatan jenis tumbuhan pohon oleh suku Wondama di desa Tandia, Wasior Kabupaten Manokwari. Beccariana 3(2): 19-30.
401	Susanti. 2016.Inventarisasi Tumbuhan Sarang Semut di Kabupaten Fakfak, Papua Barat (The Inventory of Ant-plant in Fakfak, Papua Barat). Departemen Biologi Fakultas Matematika Dan Ilmu Pengetahuan Alam Institut Pertanian Bogor.
402	Susiarti. 2003. Use of Plants in Muyu Community at Soa Village and Its Surroundings, Merauke, Papua. Benta Biologi 6(5): 705-711.
403	Susiarti. 2005. Jenis-Jenis Pengganti Pinang dan Gambir dalam Budaya Menginang Masyarakat di Kawasan Taman Nasional Wasur, Merauke, Papua. Biodiversitas 6 (3): 217-219.
404	Sutarno. 2001. Tumbuhan Penghasil Warna Alami Dan Pemanfaatannya Dalam Kehidupan Suku Meyah Di Desa Yoom Nuni, Manokwari. Jurusan Kehutanan, Fakultas Pertanian, Universitas Negeri Cenderwasih, Manokwari.
405	Sutarno. 2009. Autekologi Begonia Spp. (Begoniaceae) Manfaatnya Bagi Suku Arfak Di Daerah Mokwam Manokwari. Sekolah Pascasarjana Institut Pertanian Bogor.
406	Syahrawi. 2008. Studi Pemanfaatan Sarang Semut (Myrmecodia pendans Merr. & Perry) Oleh Masyarakat Sekitar Taman Nasional Wasur. Departemen Konservasi Sumberdaya Hutan Dan Ekowisata Fakultas Kehutanan Institut Pertanian Bogor.
407	Takeuchi & Golman. 2002. The Identity of Eaglewood (Gryinops, Thymlaeaceae), A New Economic Resource for Papua New Guinea. Sida 20 (1): 261-267.
408	Takeuchi. 2000. A Floristic and Ethnobotanical Account of the Josephstaal Forest Management Agreement Area, Papua New Guinea. Sida Contributions to Botany 19 (1): 1-63.
409	Telban. 1988. The role of medical ethnobotany in ethnomedicine: A New Guinea example. J Ethnobiol 8(2): 149-169.
410	Thaman. 1992. The Ethnobotany of Pacific Island Coastal Plants. Science of Pacific Island peoples, 3: 147-184.
411	Thomas. 2000. Psychoactive Plant Use In Papua New Guinea: A Review. Science in New Guinea, 25 (1): 33-59.
412	Thomas. 2003. The Psychoactive Flora of Papua New Guinea. Journal of Psychoactive Drugs 35 (2): 285-293.
413	Thomas. 2006. Galbulimima bark and ethnomedicine in Papua New Guinea. Papua New Guinea Medical Journal 49 (1-2): 57-59.
414	Tirajoh et al. 2012. Nutrient Composition of Two Different Varieties Of Foxtail Millet (Setaria italica Sp.) And Their Potential Use As Poultry Feed Ingredient. International Conference On Livestock Production And Veterinary Technology.
415	Triantoro et al. 2008.Keanekaragaman Jenis Flora Pada Cagar Alam Pegunungan Yapen Tengah, Provinsi Papua (Biodiversity of Flora in Central Yapen Mountain Range Nature Reserve, Papua Province). Info Hutan 5 (1): 25-34.
416	Triestini. 2000. Pemanfaatan jenis kayu oleh masyarakat ambai sebagai bahan baku komponen bangunan rumah berlabuh. Jurusan Kehutanan, Fakultas Pertanian, Universitas Cenderwasih, Manokwari.
417	Trudgen & Baker. 2008. A revision of the Heterospathe elegans (Arecaceae) complex in New Guinea. Kew Bulletin 63: 639-647.
418	Tsuji et al. 2011. Biological and Ethnobotanical Characteristics of Nipa Palm (Nypa fructicans Wurmb.): A Review. Sains Malaysiana 40(12): 1407-1412.
419	Turnbull et al. 1983. Seed Collections of Tropical Acacias In Indonesia, Papua New Guinea and Australia. Forest Genetic Resources Information 12: 2-15.
420	Turot et al. 2016. Potensi Pemanfatan Tumbuhan Paku Diplazium esculentum Swartz (Studi Kasus) Di Kampung Ayawasi, Distrik Aifat Utara, Kabupaten Maybrat, Provinsi Papua Barat. Agri-SosioEkonomi Unsrat 12 (3): 1-10.
421	Tuturop et al. 2009. Upaya Pemanfaatan Ekstrak Biji Keben Barringtonia asiatica (L.) Kurz terhadap Kematian Kutu Tempurung Hijau Coccus viridis pada Tanaman Kopi Coffea sp. Jurnal Biologi Papua 1(2): 51-57.
422	Uji. 2005. Keanekaragaman Dan Potensi Flora Di Cagar Alam Pegunungan Cyclops, Papua. Jurnal Teknologi Lingkungan 6(3): 485-495.
423	Uji. 2007. Review: Keanekaragaman Jenis Buah-Buahan Asli Indonesia dan Potensinya (Species diversity of indigenous fruits in Indonesia and its potenial). Biodiversitas 8 (2): 157-167.
424	Umezaki et al. 1999. Diet among the Huli in Papua New Guinea Highlands When They Were Influenced by The Extended Rainy Period.Ecology of Food and Nutrition 37: 409-427.
425	Ungirwalu et al. 2016. Pengelolaan Adaptif Pemanfaatan Buah Hitam (Haplolobus monticola Blumea) Etnis Wandamen-Papua (Adaptive Management Utilization of Black Fruit (Haplolobus monticola Blumea) Ethnic Wandamen-Papua). Jurnal Manusia dan Lingkungan 23 (2): 266-275.
426	Ungirwalu et al. 2016. The ethno-techno-conservation approach in the utilization of Black Fruit (Haplolobus sp.) by the Wandamen ethnic of Papua, Indonesia. Biodiversitas 18 (4): 1336-1343.
427	UNIPA. 2006. Pemerintah Kabupaten Waropen. Online. https://www.waropenkab.go.id/potensi-daerah/hasil-mangrove
428	Utteridge. 2011. A revision of the genus Medusanthera (Stemonuraceae, Icacinaceae s.l.). Kew Bulletin 66: 49-81.
429	van der Vossen & Umali (Eds). 2001. Plant Resources of South-East Asia No. 14 Vegetable oils and fats. Book.
430	van der Vossen & Wessel (Eds.). 2000. Plant Resources of South-East Asia No. 16: Stimulants. Book.
431	Van Heist et al. 2015. Exploring Local Perspectives for Conservation Planning: A Case Study from a Remote Forest Community in Indonesian Papua. Forests 6: 3278-3303.
432	van Royen. 1957. Revision of the Sapotaceae of the Malaysian area in a wider sense. VII: Planchonella. Blumea 8(2): 235-437.
433	van Steenis. 1948. Flora Malesiana. Series 1: Volume 4.
434	van Steenis. 1955. Flora Malesiana. Series 1: Volume 5.
435	van Steenis. 1960. Flora Malesiana. Series 1: Volume 6 Part 1.
436	van Steenis. 1962. Flora Malesiana. Series 1: Volume 6 Part 2.
437	van Steenis. 1964. Flora Malesiana. Series 1: Volume 6 Part 3.
438	van Steenis. 1971. Flora Malesiana. Series 1: Volume 7 Part 1.
439	van Steenis. 1972. Flora Malesiana. Series 1: Volume 7 Part 2.
440	van Steenis. 1974. Flora Malesiana. Series 1: Volume 7 Part 3.
441	van Steenis. 1976. Flora Malesiana. Series 1: Volume 7 Part 4.
442	van Steenis. 1977. Flora Malesiana. Series 1: Volume 8 Part 2.
443	van Steenis. 1978. Flora Malesiana. Series 1: Volume 8 Part 3.
444	van Steenis. 1979. Flora Malesiana. Series 1: Volume 9.
445	van Steenis. 1984. Flora Malesiana. Series 1: Volume 10 Part 1.
446	van Steenis. 1986. Flora Malesiana. Series 1: Volume 10 Part 2.
447	van Steenis. 1988. Flora Malesiana. Series 1: Volume 10 Part 3.
448	van Steenis. 1989. Flora Malesiana. Series 1: Volume 10 Part 4.
449	van Steenis. 1993. Flora Malesiana. Series 1: Volume 11 Part 2.
450	van Valkenburg & Bunyapraphatsara (Eds). 2001. Plant Resources of South-East Asia No. 12(2) Medicinal and poisonous plants 2.
451	Verdcourt. 1979. A manual of New Guinea Legumes. Book.
452	Vink. 2002. Some Malesian species of Pouteria (Sapotaceae). Blumea 47: 95-147.
453	Wahyudi et al. 2012. Berberine in the Medicinal Plant of Tali kuning (Tinospora dissitiflora Diels). Wood Research Journal 2(2): 100-104.
454	Wahyudi. 2013. Buku Pegangn Hasil Hutan Bukan Kayu. Book.
455	Wahyudi. 2014. Pemanfaatan Vegetasi Mangrove sebagai Obat-obatan Tradisional pada Lima Suku di Papua (Utilization of Mangrove Vegetation as Tradisional Medicines for Five Ethnics Groups in Papua). Biota 19(1):1-8.
456	Wahyudi. 2017. Non-Timber Forest Product (NTFP) Commodities Harvested and Marketed by Local People at the Local Markets in Manokwari-West Papua. Indonesian Journal of Forestry Research 4 (1): 27-35.
457	Walujo et al. 2007. Ethnotaxonomical Study on the Red Pandan (Pandanus conoideus Lamarck) in order to Correlate the Local Wisdom and Scientific Thought. Berita Biologi 8 (5): 391-404.
458	Wanma et al. 2013. Ethnobotanical aspect of Noken: Case Study in the High Mountain Indigenous community of Papua Island, Indonesia. Indian Journal of Traditional Knowldge 12(2): 202-208.
459	Waterhouse. 2003. Know your enemy: recent records of potentially serious weeds in northern Australia, Papua New Guinea and Papua (Indonesia). Telopea 10 (1): 477-485.
460	Watson. 1964. A Previously Unreported Root Crop from the New Guinea Highlands. Ethnology 3(1):1-5.
461	Watson. 1965. From Hunting to Horticulture in the New Guinea Highlands. Ethnology 4(3): 295-309.
462	Watson. 1968. Pueraria: Names and Traditions of a Lesser Crop of the Central Highlands, New Guinea. Ethnology 7(3): 268-279.
463	Westphal & Jansen (Eds.). 1989. Plant Resources of South-East Asia: A Selection. Book.
464	Weya. 2010. Pemanfaatan Tanaman Lilin ( Setaria palmifolia ) Sebagai Obat Tradisional Dalam Kehidupan Beberapa Suku Di Kabupaten Puncak Jaya Provinsi Papua). http://sayurlilin.blogspot.co.uk/2010/09/pemanfaatan-tanaman-sayur-lilin-setaria.html.
465	Widya et al. 2015. Ethnobotany and Conservation of Ketimunan/Timonius timon (Spreng.) Merr. In Local Communities of Kanume Tribe in Wasur National Park, Papua. Media Konserasi, 20(2): 149-158.
466	Widya. 2015. Bioekologi, Etnobotani Dan Konservasi Ketimunan/ Timonius timon (Spreng.) Merr. Pada Masyarakat Lokal Suku Kanume Di Taman Nasional Wasur Papua. Sekolah Pascasarjana Institut Pertanian Bogor.
467	Widyastuti et al. 2002. Dani Women's Knowledge on and its contribution to maintenance of sweet potato diversity in Baliem Valley. Exploring the Complementarities of In Situ and Ex Situ Conservation Strategies for Asian Sweetpotato. Genetic Resources 150-158.
468	Wihel. 2015. Komposisi Flora Mangrove Di Pantai Sungai Gamta, Distrik Misool Barat, Kabupaten Raja Ampat. Prosidings Seminar Nasional Raja Ampat Waisai 13-13 Agustus 2014.
469	Wijaya & Pohon. 2009. Kajian Teknis Standar Minyak Buah Merah (Pandanus conoideus Lam). Prosiding PPI Standardisasi.
470	Wilujeng & Simbiak. 2015. Karakterisasi morfologi Xanthostemon novoguineensis Valeton (Myrtaceae) dari Papua. Prosiding Semimar Nasional Masyarakat Biodiversitas Indoneisa 1(3): 466-471.
471	Winara & Mukhtar. 2016. Pemanfaatan Tumbuhan Obat Oleh Suku Kanum Di Taman Nasional Wasur, Papua (Utilization of Medicinal Plants by Kanum Tribe in Wasur National Park, Papua). Jurnal Penelitian Hutan dan Koservasi Alam 13(1): 57-72.
472	Winara et al. 2017. Keanekaragaman Jenis Tumbuhan Pada Hutan Kayu Putih Dan Pemanfaatannya Oleh Masyarakat Setempat Di Taman Nasional Wasur, Papua (Diversity of Plant Species on Cajuput Forest and Its Utilizations by Local People in Wasur National Park, Papua).Jurnal Penelitian Hutan dan Koservasi Alam 14 (1): 1-19.
473	Wiriadinata et al. 1992. Plants and Flowers of Baliem Valley Jayawijaya. Book: Research and Development Centre For Biology, Indonesian Institue of Sciences.
474	Wiriadinata et al. 2016. Notes on Malesian Fabaceae (Leguminosae-Papilionoideae) 16. The Genus Mucuna. Blumea 61: 90-124.
475	Wiriadinata. 1995. Ethnobotany of Economic Plants in the Baliem Valley, Jayawijaya, Irian Jaya. In: Schneider, J. ed. Indigenous Knowledge in Conservation of Crop Genetic Resources, Proceedings of an International Workshop held in Cisarua, Bogor, Indonesia January 30-February 3, 1995. Bogor, CIP-ESEAP/CRIFC, pp. 87-98.
476	Wiriadinata. 2009. Medicinal plants of Wamena, Jaya Wijaya Papua Indonesia.In: 2009 International Biodiveristy Conference in Papua.
477	Womersley. 1978. Handbooks of the Flora of Papua New Guinea Volume 1. Melbourne University Press, Carlton South, Victoria.
478	Woodley. 1991. Medicinal Plants of Papua New Guinea Part 1: Morobe Province. Book.
479	Woretma. 2013. Keanekaragaman Tumbuhan Pangan dan Obat pada Masyarakat Suku Mbaham Mata di Kampung Werabuan, Kabupaten Fakfak (Food and Medicinal Plant Diversity, in Mbaham Mata Tribe Society In Werabuan Village, Fakfak District). Departemen Konservasi Sumberdaya Hutan Dan Ekowisata Fakultas Kehutanan Institut Pertanian Bogor.
480	World Health Organisation. 2009. Medicinal Plants in Papua New Guinea. Book.
481	Yansip et al. 2017. Jenis-Jenis Tumbuhan Berkhasiat Obat Tradisional Di Masyarakat Desa Yanim Dan Braso Distrik Kemtuk Gresi Kabupaten Jayapura (The Kind Of Plants To Use As Traditional Medicine For People Who Live At Village Of Yanim And Braso, District Of Kemtuk Gresi Of Jayapura Regency). Jurnal Biologi Makassar 2 (2): 1-11.
482	Yarman & Damayanti. 2012. Pemanfaatan Dan Upaya Konservasi Kayu Putih (Asteromyrtus symphyocarpa) Di Taman Nasional Wasur. Media Konserasi 17 (2): 85-93.
483	Yazan & Armania. 2014. Dillenia species: A Review of the traditional uses, active constituents and pharmacological properties from pre-clincial studies. Pharmaceutical Biology 52 (7): 890-897.
484	Yewen et al. 2008. Struktur Komunitas Dan Penyebaran Mangrove Serta Upaya Pengelolaannya Oleh Masyarakat Distrik Teminabuan, Kabupaten Sorong Selatan. In Prosiding Konferensi Nasional VI Pengelolaan Sumberdaya Pesisir dan Lautan tanggal 26 – 29 Agustus 2008 di Manado, 305–319.
485	Yoshinaga. 1991. Dietary selenium intake of the Gidra, Papua New Guinea. Ecology of Food and Nurtition 26 (1): 27-36.
486	Zebua. 2016. Pengetahuan Tradisional Masyarakat Papua dalam Mengenali, Mengklasifikasi dan Memanfaatkan Pandan Buah Merah (Pandanus conoideus Lam.). Jurnal Biologi Papua 8(1): 23-37.
487	Zona. 2005. A Revision of Ptychococcus (Arecaceae). Systematic Botany, 30 (3): 520-529.
488	Zumbroich. 2011. To Strengthen the Teeth and Harden the Gums-Teeth blackening as medical practice in Asia, Micronesia and Melanesia. Ethnobotany Research & Applications 9: 97-113.
