# Supplementary material for: Indigenous Knowledge of New Guinea’s Useful Plants: A Review1
Source: Springer Nature journal article supplement (doi:10.1007/s12231-019-09464-1), 2019-07-24
Supplement: MOESM2 [file 12231_2019_9464_MOESM2_ESM.xlsx]

## Sheet: Sheet1
Habitat	Use Reports	Uses	Families	Genera	Species	Indigenous groups	References
1. Mangrove forest (sea level)	907	647	38	69	87	13	33
2. Lowland savannah (sea level)	90	75	32	51	42	3	4
3. Lowland peat swamp forest (sea level)	247	105	40	70	69	9	14
4. Lowland tropical rainforest (0-500 m)	9782	7765	184	736	1552	90	173
5. Lower montane forest (500-1500 m)	12626	8176	205	799	1668	44	139
6. Mid montane forest (1500-2800 m)	9716	5409	192	684	1346	46	118
7. Upper montane forest (2800-3200 m)	772	676	63	83	134	13	48
8. Subalpine forest and alpine grasslands (>3200m)	533	483	37	41	79	9	30
