# Supplementary material for: Indigenous Knowledge of New Guinea’s Useful Plants: A Review1
Source: Springer Nature journal article supplement (doi:10.1007/s12231-019-09464-1), 2019-07-24
Supplement: MOESM3 [file 12231_2019_9464_MOESM3_ESM.xlsx]

## Sheet: Sheet1
No.	Family	Use Reports	Uses	Useful Species (Total species)	Indigenous groups	References
1	Fabaceae	2355	1467	204 (283)	73	176
2	Arecaceae	2294	1178	119 (286)	115	188
3	Moraceae	2049	1188	112 (196)	84	159
4	Euphorbiaceae	1589	1091	113 (240)	70	153
5	Myrtaceae	1304	865	126 (315)	54	131
6	Poaceae	1269	757	107 (373)	69	151
7	Rubiaceae	1213	844	126 (759)	50	117
8	Malvaceae	966	636	72 (136)	59	137
9	Lamiaceae	903	580	65 (76)	51	120
10	Pandanaceae	880	379	47 (184)	57	125
11	Urticaceae	874	566	65 (158)	58	100
12	Meliaceae	847	609	69 (98)	32	76
13	Lauraceae	783	565	98 (242)	53	92
14	Apocynaceae	760	470	56 (282)	48	119
15	Phyllanthaceae	727	504	71 (198)	44	91
16	Zingiberaceae	716	408	36 (205)	63	112
17	Elaeocarpaceae	694	529	53 (126)	24	46
18	Anacardiaceae	658	423	37 (48)	57	91
19	Sapindaceae	643	368	52 (146)	48	99
20	Rutaceae	633	429	55 (142)	48	96
