# Supplementary material for: Indigenous Knowledge of New Guinea’s Useful Plants: A Review1
Source: Springer Nature journal article supplement (doi:10.1007/s12231-019-09464-1), 2019-07-24
Supplement: MOESM4 [file 12231_2019_9464_MOESM4_ESM.xlsx]

## Sheet: Sheet1
No.	Genus	Family	Use Reports	Uses	Indigenous groups	References
1	Ficus	Moraceae	1551	918	64	124
2	Pandanus	Pandanaceae	777	301	56	122
3	Syzygium	Myrtaceae	610	385	39	79
4	Terminalia	Combretaceae	555	280	26	68
5	Elaeocarpus	Elaeocarpaceae	534	411	19	37
6	Musa	Musaceae	393	143	50	97
7	Alstonia	Apocynaceae	386	164	36	78
8	Metroxylon	Arecaceae	380	114	65	87
9	Macaranga	Euphorbiaceae	370	278	28	46
10	Ipomoea	Convolvulaceae	367	141	50	99
11	Piper	Piperaceae	356	216	45	88
12	Calophyllum	Calophyllaceae	337	235	17	48
13	Canarium	Burseraceae	330	214	19	45
14	Garcinia	Clusiaceae	324	211	22	49
15	Calamus	Arecaceae	317	163	36	60
16	Artocarpus	Moraceae	309	292	48	82
17	Cocos	Arecaceae	298	109	28	70
18	Zingiber	Zingiberaceae	276	109	37	79
19	Colocasia	Araceae	271	58	45	83
20	Dysoxylum	Meliaceae	262	207	9	25
