# Supplementary material for: Indigenous Knowledge of New Guinea’s Useful Plants: A Review1
Source: Springer Nature journal article supplement (doi:10.1007/s12231-019-09464-1), 2019-07-24
Supplement: MOESM5 [file 12231_2019_9464_MOESM5_ESM.xlsx]

## Sheet: Sheet1
No.	Species	Family	Use Reports	Uses	Indigenous groups	References
1	Cocos nucifera	Arecaceae	298	109	28	70
2	Colocasia esculenta	Araceae	255	50	40	73
3	Alstonia scholaris	Apocynaceae	238	82	27	66
4	Metroxylon sagu	Arecaceae	233	67	36	64
5	Pandanus conoideus	Pandanaceae	218	40	34	67
6	Cordyline fruticosa	Asparagaceae	217	71	42	64
7	Pometia pinnata	Sapindaceae	203	56	23	57
8	Ipomoea batatas*	Convolvulaceae	202	31	37	74
9	Morinda citrifolia	Rubiaceae	192	81	14	37
10	Artocarpus altilis	Moraceae	175	64	34	62
11	Zingiber officinale*	Zingiberaceae	172	54	24	56
12	Carica papaya*	Caricaceae	154	43	28	55
13	Areca catechu	Arecaceae	152	67	26	52
14	Nypa fruticans	Arecaceae	143	60	12	23
15	Pterocarpus indicus	Fabaceae	142	53	15	38
16	Plectranthus scutellarioides	Lamiaceae	140	58	20	41
17	Gnetum gnemon	Gnetaceae	138	42	22	52
18	Terminalia catappa	Combretaceae	137	62	14	40
19	Setaria palmifolia	Poaceae	131	40	29	48
20	Pipturus argenteus	Urticaceae	122	60	20	36
	* indicates non-native species
