# Supplementary material for: Indigenous Knowledge of New Guinea’s Useful Plants: A Review1
Source: Springer Nature journal article supplement (doi:10.1007/s12231-019-09464-1), 2019-07-24
Supplement: MOESM6 [file 12231_2019_9464_MOESM6_ESM.xlsx]

## Sheet: Sheet1
Species	Habitat	Use Category	Description of uses
Abelmoschus manihot (L.) Medik.	3, 4, 5, 6	Environmental; Human food; Medicine	Commonly planted in home gardens, either as an ornamental or for traditional medicinal use. Has plenty of glutinous sap and planting it makes the garden soil friable. It is also a fast growing plant that encourages the taro plants to grow in a similar manner. Planted around the edges of the mound as fences. Leaves and shoots used frequently as a vegetable and grown in many subsistence gardens. It…
Alstonia scholaris (L.) R. Br.	2, 3, 4, 5	Construction; Culture; Environmental; Fuel; Human food; Medicine; Utensils and tools	Wood is suitable for boxes, crates, coffins, drawing boards, picture frames, matches, shuttering, interior trim, furniture components, prahus, foundry patterns, and handicrafts such as wooden shoes, toys, puppets and masks. Stems are used for making traditional boats. The recently cut wood is used for making plates, kundu drums, and planks for the doors of houses. Wood yields good pulp. The milk …
Araucaria cunninghamii Mudie	4, 5, 6, 7	Construction; Culture; Environmental; Fuel; Human food; Utensils and tools	An excellent timber which is used for all kinds of light construction and interior work including mouldings, linings, panelling, domestic flooring, shelves, cupboards, general joinery, cabinet work. Bark used for thatching. Good yields of pulp that can be bleached satisfactorily. May find use as premium grade pulp due to high tearing strenght, which is useful in mixutres with hardwood pulp. The t…
Areca catechu L.	4, 5, 6	Construction; Culture; Medicine; Utensils and tools	Stems provide useful building material, used in the construction of canoes and rafts. Leaf petiole as fire hearth, and platform. A popular psychoactive drug plant in New Guinea and the practice of chewing betel nut is common. Betle nuts are most often chewed with the betel leaf or fruit (Piper betle) and with slacked lime from processed coral, sea shells or mountain lime. As a dye, the bark of th…
Artocarpus altilis (Parkinson) Fosberg	3, 4, 5, 6	Animal food; Construction; Culture; Environmental; Human food; Medicine; Utensils and tools	Leaves and fallen fruit are good animal feed. Wood used for boats and rafts, light framing, interior trim, moulding, shuttering, crates, timber. Bark used as clothing, rope, wrapping and adhesive. The wood can be used for furniture, toys, raw pulp. Sap used as a wash to prepare bark for painting elsewhere in PNG; sometimes as a glue for making drums and as bird lime. The sap (extracted from tree …
Avicennia alba Blume	1	Animal food; Construction; Culture; Fuel; Human food; Medicine; Toxic	Young leaves can be used as fodder. The wood of Avicennia is used for house building (posts, columns, beams, roofing), mine props, inlaying and other decorative purposes, furniture, boat building (knees, crooks), paneling, rice mortars, and mallets. It is thought to be suitable for paving; Resin from the seed used medicinally as an ointment for ulcers, tumors, and has been applied as a contracept…
Avicennia marina (Forssk.) Vierh.	1	Animal food; Construction; Culture; Environmental; Fuel; Human food; Medicine	Leaves are used as fodder. Wood produces high quality paper materials. Its wood grit is excellent for materials raw in the manufacture of laundry soap. Thought suitable fir small-scale agroforestry in coastal villages, yielding luxury lumber and construction material. The bark is traditionally used for tanning leather but contains only little tannin. Good firewood, as it dries very fast. The youn…
Avicennia officinalis Blume	1	Construction; Fuel; Human food; Medicine	The wood of Avicennia is used for house building (posts, columns, beams, roofing), mine props, inlaying and other decorative purposes, furniture, boat building (knees, crooks), paneling, rice mortars, and mallets. It is thought to be suitable for paving. The wood can be used as firewood. Seedlings and young leaves of A. officinalis are edible. Seeds can be eaten after washing and boiled. Slightly…
Barringtonia asiatica (L.) Kurz	1, 4, 5	Animal food; Construction; Environmental; Fuel; Human food; Medicine; Toxic; Utensils and tools	The wood is used for temporary construction, local house building (posts, beams), general planking, flooring, boat buidling, mouldings, interior finish, handles of non-striking tools, household utensils, aand gricultural implements. Planted as a wind-break and for shade. Seeds used to eradicate green aphids (Coccus viridis) in coffee plants. Wood sometimes used for fuel. Seeds eaten after cooking…
Calophyllum pauciflorum A.C. Sm.	1, 4, 5	Construction; Human food; Medicine; Utensils and tools	Much used for canoe manufacture since the shape of its curved trunks can be followed in construction. Used in sawn construction timber, cross-arms, light framing, piles, posts and poles, cladding, decking, flooring, joinery, furniture, turnery, plywood, panelling, mouldings and shelving. Young fruit salted for food. Can be used as dye, oil, and medicine. All parts of this tree have traditional me…
Canarium indicum L.	4, 5	Animal food; Construction; Construction; Culture; Environmental; Fuel; Human food; Medicine; Other; Utensils and tools	The trees make an excellent windbreak and are well suited as ornamentals. Their wood is used for indoor construction, for moulding, interior finish, veneer, utility furniture, flooring, panelling, door and window frames, joinery and cabinet work. It is used for canoe making and as a firewood. Bark sap is rich in tannins and is used as a soruce of red paint. In the Sepik the segments of the nut ar…
Caryota rumphiana Mart.	4, 5, 6	Construction; Culture; Environmental; Fuel; Human food; Medicine; Utensils and tools; Toxic; Utensils and tools	Stems yield an inferior timber sometimes used for construction purposes such as planking, rafters, roofing, partitioning and fencing. In Papua New Guinea it is commonly used for flooring, and for making spears and boats. Leaf sheath fiber is durable and often harvested for thatch, cordage, and to make brushes and brooms. The leaf sheath is used to caulk boats, make rope, brushes and brooms, and t…
Castanopsis acuminatissima (Blume) A.DC.	4, 5, 6, 7, 8	Construction; Environmental; Fuel; Human food; Medicine; Toxic; Utensils and tools	Important construction species used for posts, ceiling poles, center posts, traditional round houses, and floor poles dividing men's and women's sections of women's houses. Suitable for medium to heavy construction under cover, house pots, lining, bridges, furniture, cabinet making, interior fittings, panelling, flooring, plywood, sliced veneer, packing cases, pallets, fence posts, mine props, an…
Casuarina oligodon L.A.S. Johnson	4, 5, 6	Construction; Culture; Environmental; Fuel; Human food; Medicine; Utensils and tools	It is a multi-purpose species that provides timber for fencing, firewood and house construction. The wood is used for beams, joists, rafters, masts, tools handles, shuttles, oars, cartwheels and, when treated, also for shingles, power line transmission poles, and mine props. Bark is used for lining house walls. The tree is planted for soil improvement, protect soils from erosion, as a shade tree …
Codiaeum variegatum (L.) Rumph. ex A.Juss	3, 4, 5, 6	Culture; Environmental; Medicine;	Leaves used for personal decoration. Used in rituals/magic for boundary protection and delimit trails. Ornamental. A patient with fever is made more comfortable when bathed with the green solution of the boiled leaves. Snake bite is treated by drinking the leaf sap and rubbing it on the wound after the affected flesh has been cut away with a knife. The stem sap is applied to tropical ulcers. Leav…
Colocasia esculenta (L.) Schott	3, 4, 5, 6	Animal food; Culture; Human food; Medicine	Waste leaves, corms and peel can be cooked or fermented for animal feed. Food plant with social and ceremonial importance. Corms cooked in ashes, boiled in saucepan (often with sweet potato), or steamed in earth oven. Leaves and stalks are eaten. The corm juice is used in cases of baldness, piles, as a laxative and as an antidote to insect stings. The juice from the petioles is considered styptic…
Cordyline fruticosa (L.) A.Chev.	4, 5, 6	Culture; Environmental; Fuel; Human food; Medicine; Utensils and tools	Leaves are fed to pigs with sweet potato in increase their body fat. Leaves and bark used to make clothes. Cuttings of the plant as pig fences, territorial marker and grave markers. Cuttings are also planted when people are married and at the stie of a landslide as a symbolic way of preventing further erosion. It is cultivated in the lowlands to the altitudinal limit of agriculture and is used as…
Cryptocarya massoy (Oken) Kosterm.	4, 5	Construction; Culture; Medicine; Utensils and tools	The wood is cedar like and used for canoe making, light construction, furniture, joinery, interior finishing's, panelling, light framing, flooring, mouldings, boxes and cases, veneer, plywood, turnery and brushware. The medium-weight timber can be used for house posts, interior trim, veneer and linen box linings. Bark of this species is worth attention as a spice; it has a strong cinnamon smell. …
Dioscorea alata L.	4, 5, 6	Culture; Environmental; Human food; Medicine	Yam with an important ceremonial function in New Guinea. One of the most important cultivated crops as a staple carbonhydrate; numerous varieties exist. Yams are seasonal but are perhaps the only tropical tuber which can be easily stored. They may be cooked like taro and are similar in flavour. Bulbs are sieved or boiled untill cooked. The young leaves are pounded then placed on the forehead to t…
Dracontomelon dao (Blanco) Merr. & Rolfe	4, 5, 6	Construction; Environmental; Fuel; Human food; Medicine; Toxic; Utensils and tools	The wood is considered to be one of the nicest timber because of the color marks on the stem. It resembles walnut wood and is valued. It is extensively used for furniture, and interior finish, and also for joinery, cabinet work, shop fittings, decorative (sliced) veneers, plywood, paneling, moulding, flooring, light construction, fence posts, house posts. The tree is planted as an ornamental in r…
Endospermum moluccanum (Teijsm. & Binn.) Kurz	4, 5, 6	Animal food; Construction; Culture; Environmental; Fuel; Human food; Medicine; Utensils and tools	Timber used for bridge construction. furniture, mouldings, veneer, wide boards, lining, joinery, interior finish, match splints, match boxes, shuttering turnery dowels, pattern making, packing cases, cabinet work, weather boards, shingles, drawing-boards. Sap in certain rituals of initiation. Tree used for fencing. To manufacture ax handles. This tree also has an edible fruit and the shoots are b…
Ficus copiosa Steud.	4, 5, 6	Culture; Environmental; Human food; Medicine	Bark used for bark cloth, for pigment and ropes. The leaves are used as a whisk or broom in a ritual to revive the spirit of a recently dead person. Young leaves are left in the sun for an hour or so, then cooked in water and eaten. The figs are eaten, raw or cooked. A concoction of the leaves and bark is consumed for chest pains and labored breathing. Stomach-ache is said to be relieved by massa…
Ficus wassa Roxb.	4, 5, 6	Construction; Culture; Environmental; Human food; Medicine; Utensils and tools	Bark has strong fibers which are used for ropes, bags, bark cloth for men's head covering and for women's yokal skirts. The leaves worn as protection from forest spirts. Used for male necklaces. The dry wood is used for fencing, bridges, support poles or firewood. The leaves and fruits are eaten raw or cooked. Combined leaf saps of Ficus wassa, Equisertum debile, Impatiens hawkeri and Stellaria m…
Galbulimima belgraveana (F. Muell.) Sprague	4, 5, 6	Animal food; Construction; Culture; Environmental; Medicine; Toxic; Utensils and tools	The wood is used for light framing, moulding, dowels, interior trim, wall panelling, cabinet work, joinery, plywood, clog soles, boat building, fruit cases and brushware. Bark and leaves are masticated and rubbed on the legs, are supposed to make men fierce. The leaves and bark contain alkaloids which are both narcotic and hallucinogenic and are used in New Guinea with a combination with the leav…
Gnetum gnemon L.	3, 4, 5, 6	Construction; Culture; Fuel; Human food; Medicine; Toxic; Utensils and tools	Important plant species for building. Used for heavy construction (houses and bridges). The boles are good for wharf work in fresh water. A high quality fiber is extracted from the inner bark, used among other things for the famous Sumba bow strings, as well as for fishing lines, nets and carrying bags. The inner bark used as a kind of loose and soft fabric, obtained after threshing, which serves…
Intsia bijuga (Colebr.) Kuntze	1, 2, 3, 4, 5, 6	Animal food; Construction; Culture; Environmental; Human food; Medicine; Utensils and tools	Excellent timber for furniture and building, most suitable for bridges and ship-building. A premium wood for posts, flooring, panelling, stairs, window and door frames. Heavy construction, flooring, sills, boat buidling, bridge and wharf superstructure, decking, steps, truck bodies, crossarms, carving, turnery, posts, poles, furniture, bench and counter tops, switchboards, joinery, cabinet work, …
Ipomoea batatas (L.) Lam.	3, 4, 5, 6	Animal food; Human food; Environmental; Medicine	Leaves and tubers are commonly used as pig fodder. Tubers used in ritual ceremonies. One of the most important staple foods due to its edible tubers. There are hundreds of cultivars. The petioles and tender leaves are eaten. Cuts and burns are treated by the juice from the heated tuber which dries to a rubber-like gum that holds the skin together. The leaves are boiled and the liquid drunk to rel…
Macropiper methysticum	2, 3, 4	Culture; Human food; Medicine	A beverage made from the rhizome and stems is used as a narcotic plant in traditional ceremonies like dowry, wedding ceremony, death ceremony, resolution of conflicts, and pig parties. Bark used externally to treat toothaches. Leaves are used for cleaning the digestion channels. Stem is chewed up untill being smooth and then placed on wounds to heal them. Stem used as a sedative or used for chole…
Melastoma malabathricum L.	1, 2, 3, 4, 5, 6	Animal food; Culture; Human food; Medicine; Utensils and tools	Leaves cooked and fed to pigs. Fruit yields a purple dye that was formerly used for tattooing and in dyeing string. Fruits used as beads in necklaces. Rope used for lashing houses, fences. The fruit is edible. Roots, leaves and all parts of the plant can be used as a medication for indigestion, diarrhea, bacillary dysentery, hepatitis, sprue, whitish, nosebleeds, bloody hemorrhoid. A concoction o…
Metroxylon sagu Rottb.	2, 3, 4, 5, 6	Animal food; Construction; Culture; Environmental; Fuel; Human food; Medicine; Utensils and tools	Whole young trunks, pith and pith refuse are given to animals. The leaves are used as a house wall and roof. The leaves are cut and the leaflets collected. The leaflets are folded across a length of split bamboo and sewn together. Used as a roofing material in coastal areas and lower montane forests throughout Papua New Guinea. For walls, the PNG people also use sago palm frond midribs, along wit…
Morinda citrifolia L.	1, 2, 3, 4, 5	Construction; Culture; Fuel; Human food; Medicine	The wood splits excessively in drying and uses are restricted to fuel and poles. In coastal regions, such as New Ireland, New Britain and Manus Island, bark from its root is chewed to extract the sap, which is then mixed with lime as a lake base and used as an orangey-red paint for dance ornaments. Ripe fruits to clean rust on metal or to use as shampoo. Important fruit which is used as a supplem…
Nothofagus pullei Steenis	5, 6, 7, 8	Construction;	The wood is used for general and heavy construction, house posts, furniture, scantlings, panelling, tool handles, joinery, window frames and sills, turnery, flooring, fence posts, bridge decking, sleepers, boat building and sliced veneer. Small-diameter logs have been found to be suitable for shiitake mushroom cultivation. The tree is also planted in villages and gardens.
Nypa fruticans Wurmb	1, 2, 3, 4	Construction; Culture; Human food; Medicine; Utensils and tools	Leaves are used for thatching, house walls, umbrellas, sun hats, raincoats, coarse baskets, mats and bags. Thatching of dwellings is done with fronds of Nypa fruticans which is said to be more durable than thatching made from sago frond midribs. The leaves and fruit are used as a dye for hats and bags. The kernel inside the nut is edible. It is normally eaten while immature. The base of the "nut"…
Ocimum basilicum L.	4, 5	Culture; Environmental; Human food; Medicine	Favored for its smell, the flower is used for personal decoration (usually stuffed into armbands). Flowers of the purple-flowered variety are sometimes deposited on tomb-stones and in offerings. Leaves used in ceremonial dress. Both fresh and dried leaves are used to impart a fragrant, warm and sweet flavor with pungent and clove-like notes to dishes and drinks. The nutlets, which swell and becom…
Oenanthe javanica (Blume) DC	4, 5, 6	Animal food; Culture; Environmental; Human food; Medicine	As feed for fish and small ruminants. Used in magic. A commonly consumed garden green used extensively in the highlands. Its leaves and young stems are used raw as well as cooked briefly. As a medicine for sore throats, coughs, headaches, and for sores. Leaves are chewed with wild ginger and traditional ash salt as a poison antidote.
Orthosiphon aristatus (Blume) Miq.	4, 5	Environmental; Medicine;	Often cultivated in gardens for ornamental and medicinal purposes. Leaves are used as a strong diuretic in infusions (tea) against various kinds of kidney complaints and illness, renal calculi, phosphaturic catarrh of the bladder, gout etc. and also in combination with other drugs, to stimulate the kidneys. Stem and leaves are boiled to treat breathing problems, maternity, heat in the body, and d…
Pandanus conoideus Lam.	3, 4, 5, 6	Animal food; Construction; Culture; Environmental; Human food; Medicine; Utensils and tools	The waste from the red fruit squeeze can be used as poultry feed. Remaining seeds are fed to the pigs or to chickens after oil extraction. Dry leaves used for tying sugarcane to supports, also for pig house doors. Fruit oil is used cosmetically on skin and hair. To collect oil the fruits are heated by hot stones for about 1 hour or more, then the mesocarps are peeled and squashed. It is sometimes…
Pandanus julianettii Martelli	4, 5, 6, 7	Animal food; Construction; Culture; Environmental; Human food; Medicine; Utensils and tools	Pigs eat the shells and other debris. Durable bark sheets are used for house walls. Leaves are usually used for umbrellas and temporary huts during a journey in the forest. The leaves are used for the walls and roofs of temporary huts that last for a few years. The trunk may be used, after hollowing-out, to build a water diverter to irrigate taro. Children use these leaves to create various toys,…
Pangium edule Reinw.	4, 5, 6, 7	Animal food; Construction; Culture; Fuel; Human food; Medicine; Toxic; Utensils and tools	The meat of the nuts may be eaten raw by pigs but if eaten by man, it is vomited. The wood is used for moulding, interior trim, framing, veneer and match splints. All parts are sometimes credited with narcotic properties. Shells of the nuts as rattles on dancing masks. Kernels of the nuts are eaten after cooking (boiling or baking) for an hour to remove the cyanogenic glycosides. Oil can also be …
Pipturus argenteus (G.Forst.) Wedd.	4, 5, 6	Construction; Culture; Medicine; Utensils and tools	Wood is used for construction. Mucilaginous sap used in curative rituals. The sap is used to make the hair soft. Cooked leaves are eaten as a vegetable. A patient with fever or headache should squeeze leaves, drink the sap, and rub crushed leaves on the body or forehead. A twig is cut, and the juice is collected in a container and drunk by the patient to treat constipation. Because of its laxativ…
Plectranthus scutellarioides (L.) R.Br.	4, 5, 6, 7	Culture; Environmental; Human food; Medicine; Utensils and tools	L:eaves are heated on bamboo tubes and crushed to obtain a juice that is used to make a purple dye for coloring string for bags. The sap from the black-purple variety is used for tattooing. Leaves are used in ceremonial dress. Plant used in rituals as armbands. Ornamental plant. Leaves are roasted and eaten. A fever patient is washed with a decoction of the whole plant and allowed to perspire in …
Pometia pinnata J.R.Forst. & G.Forst.	4	Construction; Culture; Environmental; Human food; Medicine; Toxic; Utensils and tools	A versatile timber suited not only to structural work, but for peeling for veneer, turnery, boat planking and framing, pianos, wharf decking, flooring, bobbins, mouldings, joinery, door and window frames, panelling, furniture, canoes, tables and tool handles. Important species for firewood. The fleshy layer around the seed is edible fresh. The roasted seeds are edible. A decoction of the bark is …
Psophocarpus tetragonolobus L. (DC.)	4, 5, 6	Animal food; Environmental; Human food; Medicine	The whole plant as well as processed seeds offer excellent animal feed. The rotation of a leguminous food crops with a root crop is a soil fertility maintenance technique. All parts of the plant are frequently consumed foods. As a root crop, the winged bean is of special interest because of the high protein content of the tuber. It is cultivated for its tubers between 1400-1850 m but has been rec…
Pterocarpus indicus Willd.	4, 5	Construction; Culture; Environmental; Medicine; Utensils	One of the most important timber trees. The wood is used for house building, furniture making, boats, cabinets, decorative veneers and other specialty items. The sap (extracted from tree trunks) is rubbed onto the body as a red body color. The wood can be used to make kundu drums but must be dried over a fire after being carved. Used as a living fence. The tree is also used as a shade tree for ot…
Saccharum officinarum L.	4, 5, 6	Animal food; Construction; Environmental; Human food;	The fibrous residue as raw material for fiber and particle board, plastics, paper and furfural. For these purposes, the fiber is separated from the pith which can, in turn be used as a feed. Sugar cane bagasse used as an organic fertilizer; The fibrous residue of cane, bagasse, is mostly used as fuel for the generation of energy needed for sugar manufacture; The contents of the inner trunk are ch…
Setaria palmifolia (J.Koenig) Stapf	4, 5, 6	Animal food; Culture; Environmental; Human food; Medicine;	Leaves and peelings fed to pigs. Used as an anti-aging drug. Planted around the edges of the mound as fences. A cultivated form, with thickened edible young shoots, is commonly used as a vegetable. Heart of stem cooked with kumu in bamboo tubes; or still with outer leaves, steamed in earth oven; more rarely cooked on fire. Important item at nearly all mumu feasts. The seeds are used as a substitu…
Sonneratia caseolaris (L.) Engl.	1	Animal food; Construction; Culture; Fuel; Human food; Medicine; Utensils and tools	Leaves may be used for fodder. Wood is used locally for interior house building, ship building, piles of bridges, sleepers, paving blocks, flooring, occasionally for furniture, sporting goods, and produces a good firewood; The wood of S. caseolaris is of poor quality and is only occasionally used for pulp or fuel. The bark contains 9-15% tannin (dry weight basis) and is locally used for tanning l…
Terminalia catappa L.	1, 4, 5, 6	Animal food; Construction; Culture; Environmental; Fuel; Human food; Medicine; Utensils and tools	Leaves can be fed to livestock and some silkworms. The timber is of some value for furniture and house and boat building. General construction, framing, flooring, interior trim, mouldings, furniture, cabinet work, joinery, coffin boards, rotary and sliced veneer, plywood, cladding, lining, wall panelling, door and window frames, planking and decking. The bark and leaves have tannins and are used …
Wollastonia biflora DC.	1, 2	Culture; Environmental; Human food; Medicine	A source of yellow dye. Salt is made from the above ground part of the plant. A badly bleeding cut is treated with the leaf sap which clots the blood and forms a protective scab. The liquid extracted from the leaves can be used to treat stomachaches or be used for new mothers. Roots are used for sexually transmitted diseases. A few new shoots and leaves are squeezed together and the juice is mixe…
Zingiber officinale Roscoe	3, 4, 5, 6	Culture; Human food; Medicine; Utensils and tools	As a stimulant or spice the rhizome of ginger is chewed. Fresh rhizome is widley used in cooking, as a flavouring or vegetable, and young rhizomes and stem parts are sometimes eaten raw. The Amungme consider it to be a native plant and it appears to be growing wild in places. The Amungme use the ginger rhizomes as snacks and for medicine. The leaves are eaten raw or cooked. The leaves and rhizome…
Habitat: 1: Mangrove forest; 2: Lowland savannah; 3: Lowland peat swamp forest; 4: Lowland tropical rain forest; 5: Lowland montane forest; 6: Mid montane forest; 7: Upper montane forest; 8: Subalpine forest and alpine grasslands.
