# Supplementary material for: Indigenous Knowledge of New Guinea’s Useful Plants: A Review1
Source: Springer Nature journal article supplement (doi:10.1007/s12231-019-09464-1), 2019-07-24
Supplement: MOESM7 [file 12231_2019_9464_MOESM7_ESM.xlsx]

## Sheet: Sheet1
Species	Plant Part	Subcategory	Indigenous groups	Native
Psidium guajava L.	Entire Leaf	Digestive System	9	no
Carica papaya L.	Entire Leaf	Infections and Infestations	7	no
Laportea decumana (Roxb.) Wedd.	Entire Leaf	General Ailments with Unspecific Symptoms	6	no
Cordyline fruticosa (L.) A. Chev.	Entire Leaf	Skin and Subcutaneous Tissue	5	yes
Laportea decumana (Roxb.) Wedd.	Entire Leaf	Musculo-Skeletal System	5	no
Laportea decumana (Roxb.) Wedd.	Entire Leaf	Skin and Subcutaneous Tissue	5	no
Morinda citrifolia L.	Fruit	General Ailments with Unspecific Symptoms	5	no
Pandanus conoideus Lam.	Fruit	Medicinal and Veterinary Other	5	yes
Plectranthus scutellarioides (L.) R.Br.	Entire Leaf	Blood and Cardiovascular System	5	yes
Zingiber officinale Roscoe	Root	Respiratory System	5	no
