# Supplementary material for: Indigenous Knowledge of New Guinea’s Useful Plants: A Review1
Source: Springer Nature journal article supplement (doi:10.1007/s12231-019-09464-1), 2019-07-24
Supplement: MOESM8 [file 12231_2019_9464_MOESM8_ESM.xlsx]

## Sheet: Sheet1
Indigenous group	Country	Use Reports	Uses	Species	References
Not specified	-	19405	13348	2542	328
Yali	IDN	1513	1295	389	7
Mianmin	PNG	1048	771	333	3
Dani	IDN	858	702	258	16
Unresolved	-	589	568	270	8
Ayawasi	IDN	443	440	236	2
Nokopo	PNG	400	345	140	5
Niami	PNG	386	380	201	1
Huli	PNG	382	363	239	5
Kalam	PNG	349	344	212	5
Kamoro	IDN	310	300	158	3
Eipo	IDN	291	233	112	2
Biak	IDN	260	246	116	9
Kamus	PNG	247	244	127	1
Marind	IDN	244	225	84	12
Ndumba	PNG	240	234	84	4
Wola	PNG	213	178	79	8
Wandamen	IDN	208	193	87	10
Tifalmin	PNG	193	104	86	1
Massim	PNG	186	183	93	1
Mbaham Mata	IDN	181	180	92	1
Telefomin	PNG	162	113	65	2
Didipa	PNG	157	155	56	1
Morori	IDN	151	145	72	4
Kukukuku	PNG	139	123	75	12
Meyah	IDN	139	134	79	9
Maian	PNG	131	130	105	2
Nekgini	PNG	96	96	62	2
Amungme	IDN	95	88	45	6
Waritai	IDN	94	51	40	2
Maenge	PNG	88	86	51	1
Gadsup	PNG	87	87	77	2
Tolai	PNG	87	84	52	3
Binendere	PNG	75	73	53	2
Maring	PNG	74	74	51	5
Kampung	IDN	66	66	44	1
Amanab	PNG	64	61	30	2
Kwerba	IDN	64	62	22	3
Muyu	IDN	64	64	38	1
Matbat	IDN	63	63	57	1
Moi	IDN	61	59	46	4
Supiori	IDN	58	57	44	1
Kaiy	IDN	57	19	16	1
Tepin	IDN	57	53	37	2
Ambaidiru	IDN	54	53	46	1
Mansinam	IDN	52	50	20	2
Foi	PNG	51	48	47	1
Kuman	PNG	51	48	32	8
Kanum	IDN	50	40	15	10
Miu	PNG	50	50	29	1
Mek	IDN	48	39	23	3
Mbowamb	PNG	45	38	30	5
Bulu	PNG	43	43	33	1
Manikion	IDN	41	41	19	6
Ambai	IDN	40	40	28	5
Goilala	PNG	39	39	25	3
Kwoma	PNG	38	37	29	5
Wopkaimin	PNG	36	34	12	3
Kaulong	PNG	33	32	31	1
Tabla	IDN	31	32	15	4
Inanwatan	IDN	30	28	14	3
Bongu	PNG	27	27	22	1
Buang	PNG	27	25	16	2
Fore	PNG	26	25	19	5
Nekematigi	PNG	25	24	8	2
Nakanai	PNG	24	23	18	3
Sumuri	IDN	23	21	15	1
Ormu	IDN	22	22	9	1
Irarutu	IDN	20	20	6	2
Yachai	IDN	20	20	20	1
Hatam	IDN	19	20	15	5
Barapasi	IDN	18	16	11	1
Sentani	IDN	18	18	10	4
Maibrat	IDN	17	17	16	2
Ketengban	IDN	15	15	7	1
Apsokok	PNG	14	14	12	1
Iatmul	PNG	14	13	6	2
Mandender	IDN	14	14	8	2
Kapanara	PNG	13	13	10	1
Kapauku	IDN	13	13	9	4
Kubo	PNG	13	13	11	3
Ankave-Anga	PNG	12	12	11	1
Gidra	PNG	12	11	11	3
Papasena	IDN	12	12	11	1
Bomagai-Angoiang	PNG	11	11	9	1
Oksapmin	PNG	11	7	4	3
Wano	IDN	10	10	3	1
Zimakani	PNG	10	10	7	1
Enga	PNG	9	11	9	5
Taburta	IDN	9	9	5	1
Biangai	PNG	8	8	7	2
Ngalum	IDN	8	8	6	1
Lani	IDN	7	6	1	1
Melpa	PNG	7	8	7	3
Orokaiva	PNG	7	7	4	4
Roro	PNG	6	6	4	2
Tauade	PNG	6	4	2	3
Abelam	PNG	5	5	5	2
Baining	PNG	5	4	3	2
Faiwolmin	PNG	5	5	4	2
Gimi	PNG	5	3	2	3
Ireres	IDN	5	5	2	1
Koiari	PNG	5	4	2	2
Lepki	IDN	5	5	4	1
Mengen	PNG	5	5	5	2
Ok	PNG	5	5	5	1
Bewani	PNG	4	4	1	1
Bukiyip	PNG	4	4	4	1
Iha	IDN	4	4	1	1
Malay	PNG	4	4	2	1
Mandori	IDN	4	4	3	1
Marap	IDN	4	3	2	1
Moni	IDN	4	4	1	1
Naho	PNG	4	4	3	2
Olo	PNG	4	4	3	2
Patep	PNG	4	4	3	2
Usiai	PNG	4	4	4	1
Ambel	IDN	3	3	3	2
Argoeni	IDN	3	3	2	1
Asmat	IDN	3	4	2	1
Daribi	PNG	3	3	1	1
Dogiyai	IDN	3	3	1	1
Gebe	IDN	3	2	2	2
Karas	IDN	3	3	3	1
Kiwai	PNG	3	3	1	2
Kurti	PNG	3	3	1	1
Motu	PNG	3	3	3	3
Sulka	PNG	3	3	3	1
Tamakuri	IDN	3	3	1	1
Urimo	PNG	3	3	3	2
Waigeo	IDN	3	3	2	2
Adzera	PNG	2	2	2	1
Angaataha	PNG	2	2	2	1
Baktaman	PNG	2	2	1	1
Bimin-Kuskusmin	PNG	2	2	1	2
Bukawa	PNG	2	2	1	1
Je	IDN	2	4	2	2
Kavataria	PNG	2	2	1	1
Mekeo	PNG	2	2	2	2
Moraid	IDN	2	2	2	1
Pari	PNG	2	2	2	1
Pawaia	PNG	2	2	1	1
Tairora	PNG	2	2	1	1
Titan	PNG	2	1	1	1
Warapu	PNG	2	2	2	1
Arammba	PNG	1	1	1	1
Asaro	PNG	1	1	1	1
Aseki	PNG	1	1	1	1
Awa	PNG	1	1	1	1
Awara	PNG	1	1	1	1
Awun	PNG	1	1	1	1
Bariai	PNG	1	1	1	1
Biami	PNG	1	1	1	1
Bilbil	PNG	1	1	1	1
Bohutu	PNG	1	1	1	1
Boku	PNG	1	1	1	1
Buruwai	IDN	1	1	1	1
Buyang	PNG	1	1	1	1
Chambri	PNG	1	1	1	1
Dobu	PNG	1	1	1	1
Fas	PNG	1	1	1	1
Gambadi	PNG	1	1	1	1
Gnau	PNG	1	1	1	1
Gogodala	PNG	1	1	1	1
Grass Koiari	PNG	1	1	1	1
Ialibu	PNG	1	1	1	1
Itik	IDN	1	1	1	1
Jimi	PNG	1	1	1	1
Kairi	PNG	1	1	1	1
Kakoli	PNG	1	1	1	1
Kalauna	PNG	1	1	1	1
Kapriman	PNG	1	1	1	1
Karon	IDN	1	1	1	1
Keraki	PNG	1	1	1	1
Kombi	PNG	1	1	1	1
Kominimung	PNG	1	1	1	1
Kurudu	IDN	1	1	1	1
Kwieftim	PNG	1	1	1	1
Kyaka	PNG	1	1	1	1
Labu	PNG	1	1	1	1
Madik	IDN	1	1	1	1
Mangseng	PNG	1	1	1	1
Marau	IDN	1	1	1	1
Matafuma	PNG	1	1	1	1
Menyamya	PNG	1	1	1	1
Mora	IDN	1	1	1	1
Northeast Kiwai	PNG	1	1	1	1
Patpatar	PNG	1	1	1	1
Pinai	PNG	1	1	1	1
Purari	PNG	1	1	1	1
Rawa	PNG	1	1	1	1
Saniyo-Hiyewe	PNG	1	1	1	1
Semariji	PNG	1	1	1	1
Serui-Laut	IDN	1	1	1	1
Suau	PNG	1	1	1	1
Tarpini Hill	PNG	1	1	1	1
Tehit	IDN	1	1	1	1
Teop	PNG	1	1	1	1
Toura	PNG	1	1	1	1
Ura	PNG	1	1	1	1
Wagawaga	PNG	1	1	1	1
Wagu	PNG	1	1	1	1
Waifoi	IDN	1	1	1	1
Wantoat	PNG	1	1	1	1
Waropen	IDN	1	1	1	1
Watut	PNG	1	1	1	1
Wiram	PNG	1	1	1	1
Yeinan	IDN	1	1	1	1
Yimar	PNG	1	1	1	1
